# Supplementary material for: Senolysis induced by 25-hydroxycholesterol targets CRYAB in multiple cell types
Source: PubMed Central journal article supplement (PMC8851282; doi:10.1016/j.isci.2022.103848), 2022-02-02
Supplement: mmc1.pdf [file mmc1.pdf]

**iScience, Volume 25**

**Supplemental information**

**Senolysis induced by 25-hydroxycholesterol  
targets CRYAB in multiple cell types**

**Chandani Limbad, Ryosuke Doi, Julia McGirr, Serban Ciotlos, Kevin Perez, Zachary S. Clayton, Radha Daya, Douglas R. Seals, Judith Campisi, and Simon Melov**

**Supplementary Material**  
**Limbad et al. 2022**

**(a)**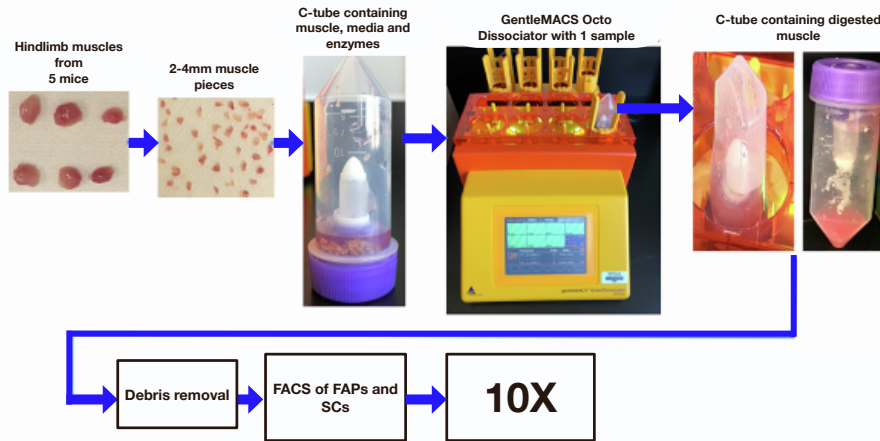**(b)**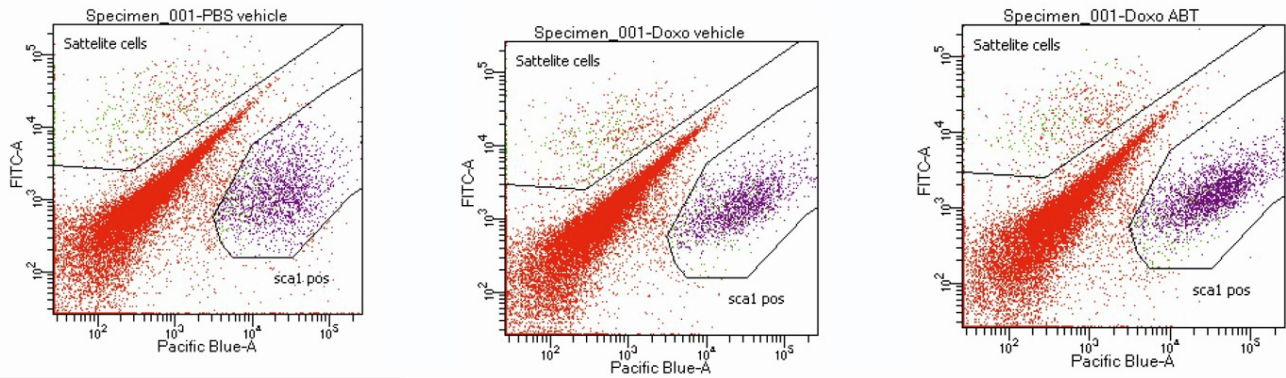

| Tube: PBS vehicle |         |         |        |
|-------------------|---------|---------|--------|
| Population        | #Events | %Parent | %Total |
| All Events        | 50,000  | ####    | 100.0  |
| cells             | 33,147  | 66.3    | 66.3   |
| fsc singlets      | 31,404  | 94.7    | 62.8   |
| live nonhematopo  | 23,714  | 75.5    | 47.4   |
| sca1 pos          | 1,825   | 7.7     | 3.6    |
| FAP               | 1,635   | 89.6    | 3.3    |
| Satellite cells   | 587     | 2.5     | 1.2    |
| P1                | 131     | 22.3    | 0.3    |
| P2                | 242     | 41.2    | 0.5    |

| Tube: Doxo vehicle |         |         |        |
|--------------------|---------|---------|--------|
| Population         | #Events | %Parent | %Total |
| All Events         | 50,000  | ####    | 100.0  |
| cells              | 36,121  | 72.2    | 72.2   |
| fsc singlets       | 34,835  | 96.4    | 69.7   |
| live nonhematopo   | 24,342  | 69.9    | 48.7   |
| sca1 pos           | 1,646   | 6.8     | 3.3    |
| FAP                | 1,427   | 86.7    | 2.9    |
| Satellite cells    | 546     | 2.2     | 1.1    |
| P1                 | 147     | 26.9    | 0.3    |
| P2                 | 195     | 35.7    | 0.4    |

| Tube: Doxo ABT   |         |         |        |
|------------------|---------|---------|--------|
| Population       | #Events | %Parent | %Total |
| All Events       | 50,000  | ####    | 100.0  |
| cells            | 34,419  | 68.8    | 68.8   |
| fsc singlets     | 33,278  | 96.7    | 66.6   |
| live nonhematopo | 20,618  | 62.0    | 41.2   |
| sca1 pos         | 2,334   | 11.3    | 4.7    |
| FAP              | 2,091   | 89.6    | 4.2    |
| Satellite cells  | 557     | 2.7     | 1.1    |
| P1               | 175     | 31.4    | 0.4    |
| P2               | 169     | 30.3    | 0.3    |

**(c)**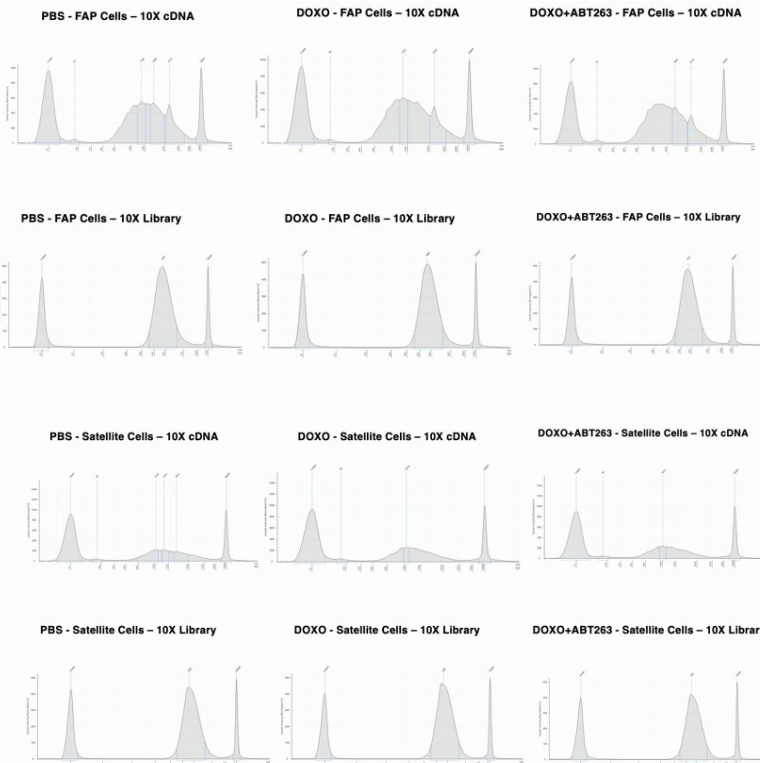**Supplementary Fig. 1 (related to Fig. 1).**

Workflow for single cell preparation (a) Workflow for FAPs and SCs sample preparation for single-cell RNA Seq on the 10X platform. (b) FACS gating strategy for isolating FAPs and SCs from mouse skeletal muscle. (c) 10X single-cell RNA seq-cDNA and library graphs for FAPs and SCs from each experimental group.

# FAPs

## DOXO vs PBS

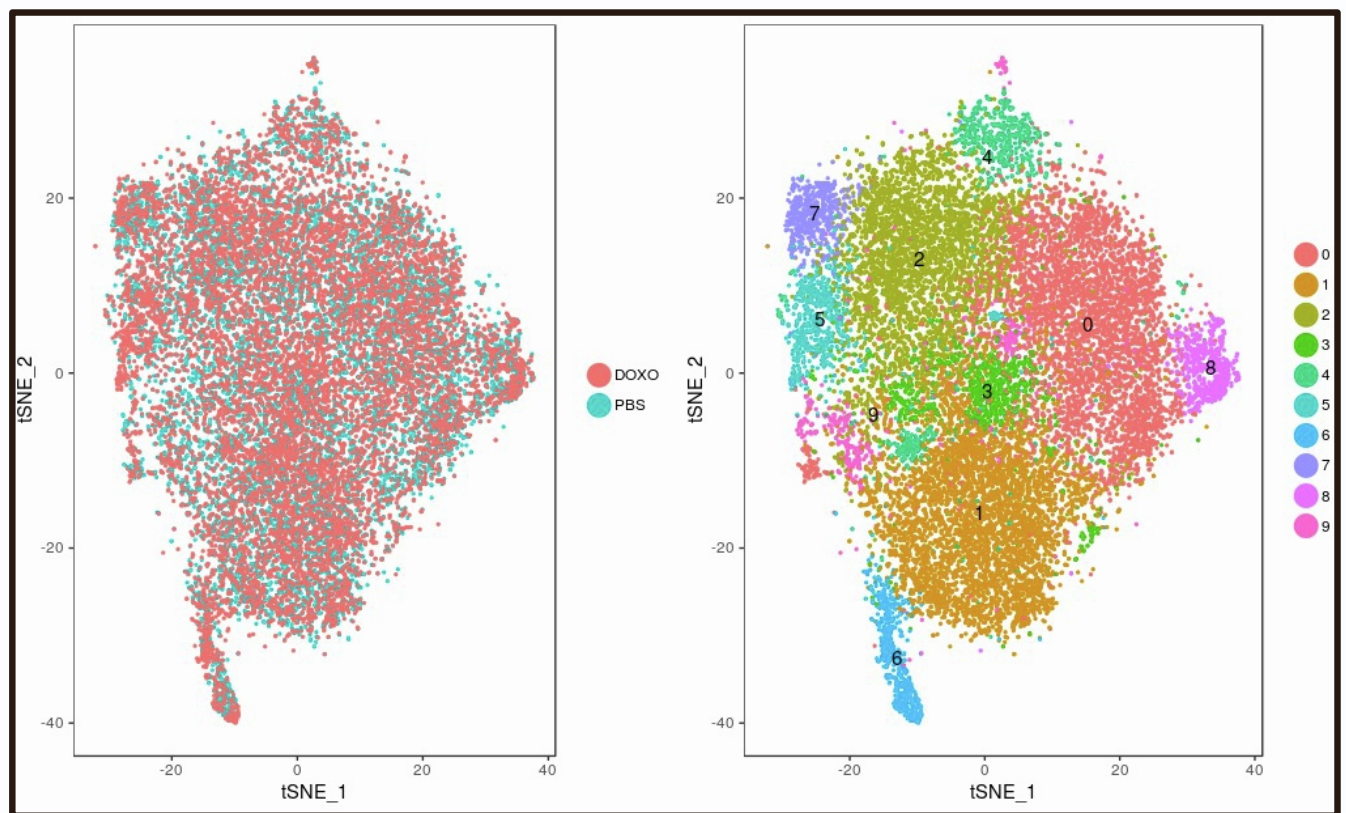

### Supplementary Fig. 2 (related to Fig. 1).

t-SNE plots showing the embeddings (left) and clustering (right) of cells analyzed in FAPs DOXO vs PBS comparisons.

**Supplementary Table 1 (related to Fig 1). Pairwise comparison of treated cells.** Total number cells analyzed in each pairwise comparison of libraries, the clusters in which we observed significant expression changes in p16 and p21 between treatment groups, and corresponding figures for reference.

| Cell Type | Comparison           | Number of Cells | p16 regulation cluster | p21 regulation cluster | Corresponding figure panel |
|-----------|----------------------|-----------------|------------------------|------------------------|----------------------------|
| FAPs      | DOXO vs. PBS         | 20,174          | ↑5                     | ↑8                     | Supplementary Figure 2     |
|           | DOXO+ABT263 vs. DOXO | 19,194          | ↓4                     | -                      | Figure 1b                  |
| SCs       | DOXO vs. PBS         | 17,164          | -                      | ↑0, 5, 9; ↓4           | Supplementary Figure 3a    |
|           | DOXO+ABT263 vs. DOXO | 16,600          | -                      | ↑8; ↓3, 4, 5, 9        | Supplementary Figure 3b    |

**Supplementary Table 2 (related to Fig 1). Cell counts, median, and mean reads per cell for each library and cell type**

| Cell Type | Library  | Cell Count | Mean Reads per Cell | Median Genes per Cell |
|-----------|----------|------------|---------------------|-----------------------|
| FAPs      | PBS      | 10,032     | 12,237              | 930                   |
|           | Doxo     | 10,142     | 12,318              | 870                   |
|           | Doxo+ABT | 9,052      | 14,033              | 1,062                 |
| SCs       | PBS      | 7,372      | 17,151              | 503                   |
|           | Doxo     | 9,792      | 12,714              | 438                   |
|           | Doxo+ABT | 6,808      | 17,870              | 489                   |

# SCs

## DOXO vs PBS

(a)

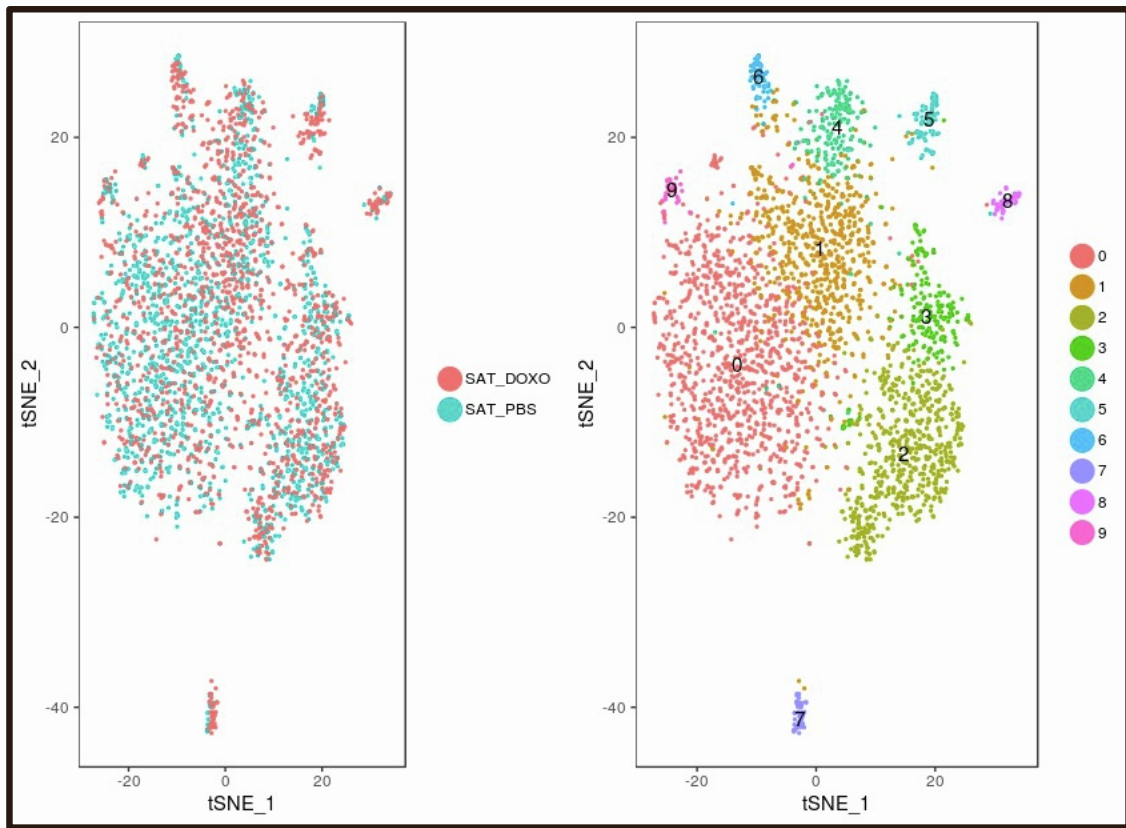

## DOXO+ABT vs DOXO

(b)

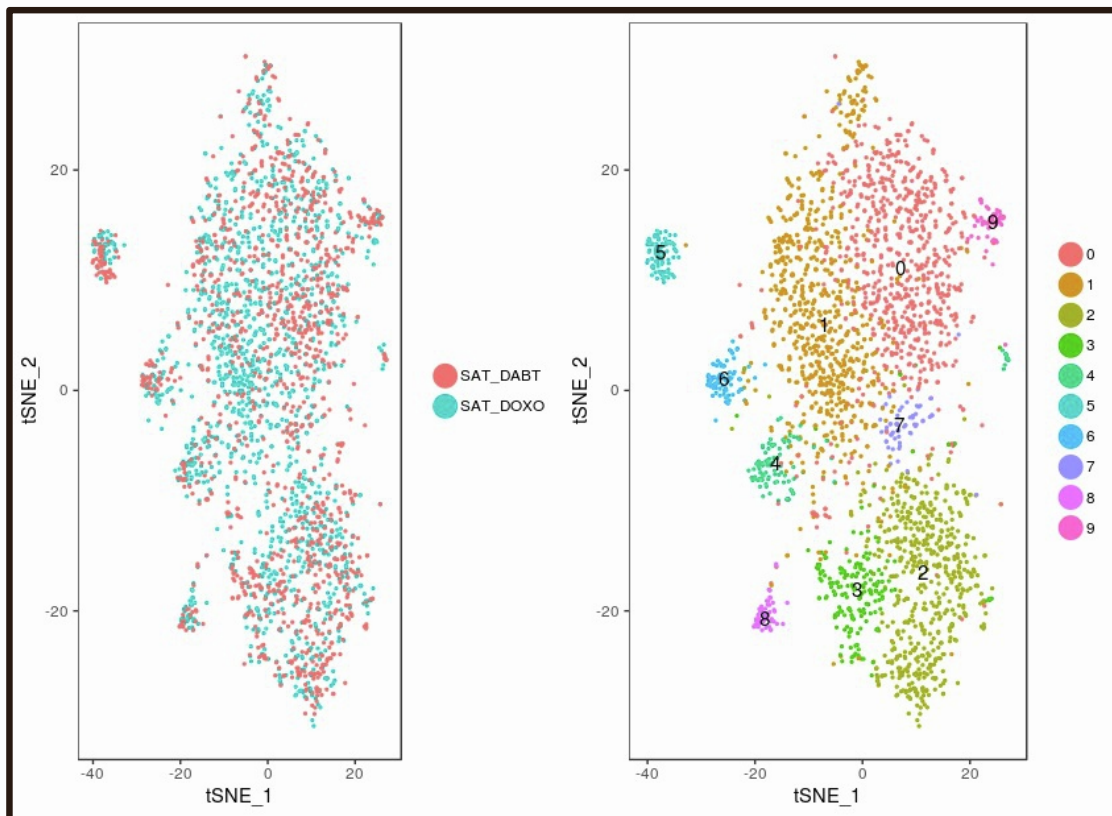

**Supplementary Fig. 3 (related to Fig. 1).** t-SNE plots showing the embeddings (left) and clustering (right) of cells analyzed in (a) SC DOXO vs PBS and (b) DOXO+ABT vs DOXO comparisons.



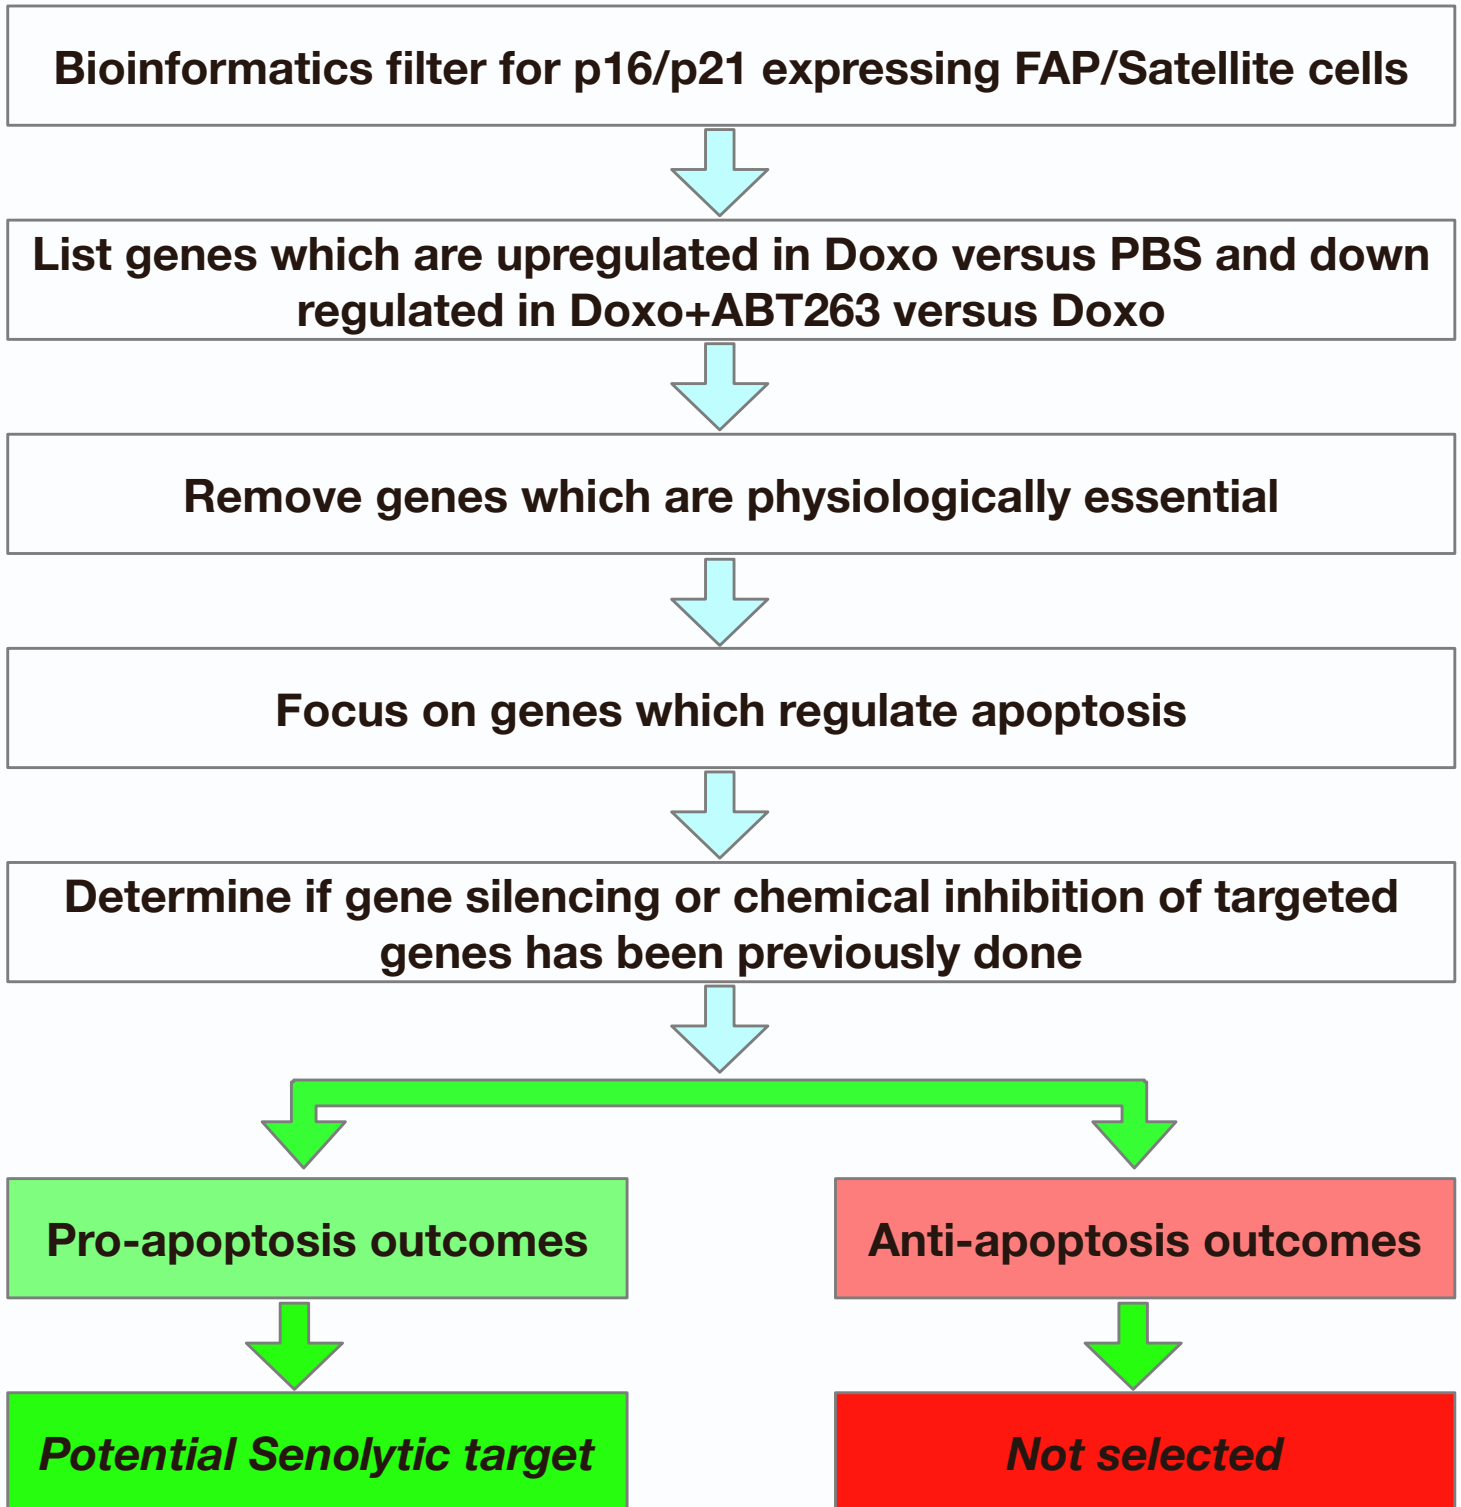

**Supplementary Fig. 4 (related to Fig. 2).** Strategy to identify potential senolytic target genes from FAP and SC single-cell RNA Seq data.

**Supplementary Table 5 (related to Fig 2). Potential senolytic target genes.**

Identified by single-cell RNA-seq analysis of senescent and non-senescent FAPs and Satellite Cells (SC) from mouse skeletal muscles

| Cell Type | #  | Gene Name | Full name                                       |
|-----------|----|-----------|-------------------------------------------------|
| FAPs      | 1  | Hmox1     | Heme oxygenase 1                                |
|           | 2  | Col1a1    | Collagen type I alpha 1 chain                   |
|           | 3  | Pltp      | Phospholipid transfer protein                   |
|           | 4  | Srxn1     | Sulfiredoxin 1                                  |
| SCs       | 5  | Cryab     | Crystallin alpha B                              |
|           | 6  | Rgcc      | Regulator of cell cycle                         |
|           | 7  | Rnf7      | Ring finger protein 7                           |
|           | 8  | Fxyd3     | FXD domain containing ion transport regulator 3 |
|           | 9  | Itgb8     | Integrin subunit beta 8                         |
|           | 10 | Cav1      | Caveolin 1                                      |

**Supplementary Table 6 (related to Fig 3). Antibodies for FAP and SC isolation by FACS**

| Antibody    | Clone         | Conjugate        | Dilution | Source     | Cat.#      |
|-------------|---------------|------------------|----------|------------|------------|
| anti-CD31   | MEC13.3       | Alexa Fluor® 488 | 1:200    | BioLegend  | 102514     |
| anti-CD45   | 30-F11        | Alexa Fluor® 488 | 1:200    | BioLegend  | 103122     |
| anti-Sca-1  | D7            | PE               | 1:80     | Invitrogen | 12-5981-82 |
| anti-PDGFRa | Polyclonal    | PE               | 1:80     | R&D        | FAB1062P   |
| anti-VCAM1  | 429 (MVCAM.A) | PE/Cy7           | 1:40     | BioLegend  | 105720     |



**Supplementary Table 7 (related to Fig 3): IC50 of senolytics on mouse and human cell types**

| <b>Cell type</b> | <b>days in culture</b> | <b>Inhibitor</b> | <b>IC50 (<math>\mu</math>M)</b> |
|------------------|------------------------|------------------|---------------------------------|
| <b>FAPs</b>      | 3                      | ABT263           | 14.7                            |
| <b>FAPs</b>      | 7                      | ABT263           | 7.5                             |
| <b>FAPs</b>      | 3                      | 25HC             | 1.7                             |
| <b>FAPs</b>      | 7                      | 25HC             | 1.2                             |
| <b>FAPs</b>      | 7                      | OB24             | 261.4                           |
| <b>SCs</b>       | 7                      | ABT263           | 14.1                            |
| <b>SCs</b>       | 7                      | 25HC             | 3.7                             |
| <b>HSMM</b>      | 3                      | ABT263           | 15.2                            |
| <b>HSMM</b>      | 3                      | 25HC             | 7.2                             |
| <b>HSMM</b>      | 7                      | ABT263           | 9                               |
| <b>HSMM</b>      | 7                      | 25HC             | 3.7                             |

**Supplementary Table 8 (related to Figs 5-9). Specific primer sequences for quantitative RT-PCR**

| Species | Genes          | Forward (5'-3')        | Reverse (5'-3')          |
|---------|----------------|------------------------|--------------------------|
| Mouse   | $\beta$ -Actin | CTAAGGCCAACCGTGAAAAG   | ACCAGAGGCATACAGGGACA     |
|         | p16            | GAACTCTTTCGGTCGTACCC   | GTTCTGAATCTGCACCGTAGT    |
|         | p21            | ACGGGACCGAAGAGACAAC    | CAGATCCACAGCGATATCCA     |
|         | Cryab          | GTTCTTCGGAGAGCACCTGTT  | GAGAGTCCGGTGTCAATCCAG    |
|         | Hmox1          | GCCGAGAATGCTGAGTTCATG  | TGGTACAAGGAAGCCATCAC     |
|         | Pltp           | CTGACGCATGGCCAAGAAGA   | CATGGCAGAGTCAAAGAAGA     |
|         | Rnf7           | ACCCTGCGTCCTTTCTTCG    | GGCACAGGTATCGCACTCAA     |
|         | Srxn1          | GACGTCCTCTGGATCAAAG    | GCAGGAATGGTCTCTCTCTG     |
|         | Rgcc           | CGCCACTTCCACTACGAGG    | CAGCAATGAAGGCTTCTAGCTC   |
|         | Itgb8          | TGGCCCTTTATTCCCGTGAC   | GGGTGGATACTAATGTATGGCGA  |
|         | Col1a1         | CTGACGCATGGCCAAGAAGA   | ATACCTCGGGTTTCCACGTC     |
|         | Cav1           | GCGACCCCAAGCATCTCAA    | ATGCCGTCGAAACTGTGTGT     |
|         | Il6            | CTCTGGGAAATCGTGAAAT    | CCAGTTTGGTAGCATCCATC     |
|         | Mmp2           | TCTGCGATGAGCTTAGGGAAAC | GACATACATCTTTCAGGAGACAAG |
|         | Timp2          | GCATCACCCAGAAGAAGAGC   | GTCCATCCAGAGGCACTCAT     |
|         | Tgfb3          | TTGGGATATCGTTAGAGGCG   | AAGAAGGAAGGCAGGAGGAG     |
| Human   | $\beta$ -ACTIN | CGTCATACTCCTGCTTGCTG   | CGTCATACTCCTGCTTGCTG     |
|         | P16            | CTACTGAGGAGCCAGCGTCT   | CTGCCATCATCATGACCT       |
|         | CRYAB          | CTTTGACCAGTTCTTCGGAG   | CCTCAATCACATCTCCCAAC     |
|         | HMOX1          | ACTGCGTTCCTGCTCAACATC  | GCTCTGGTCCTTGGTGCATG     |

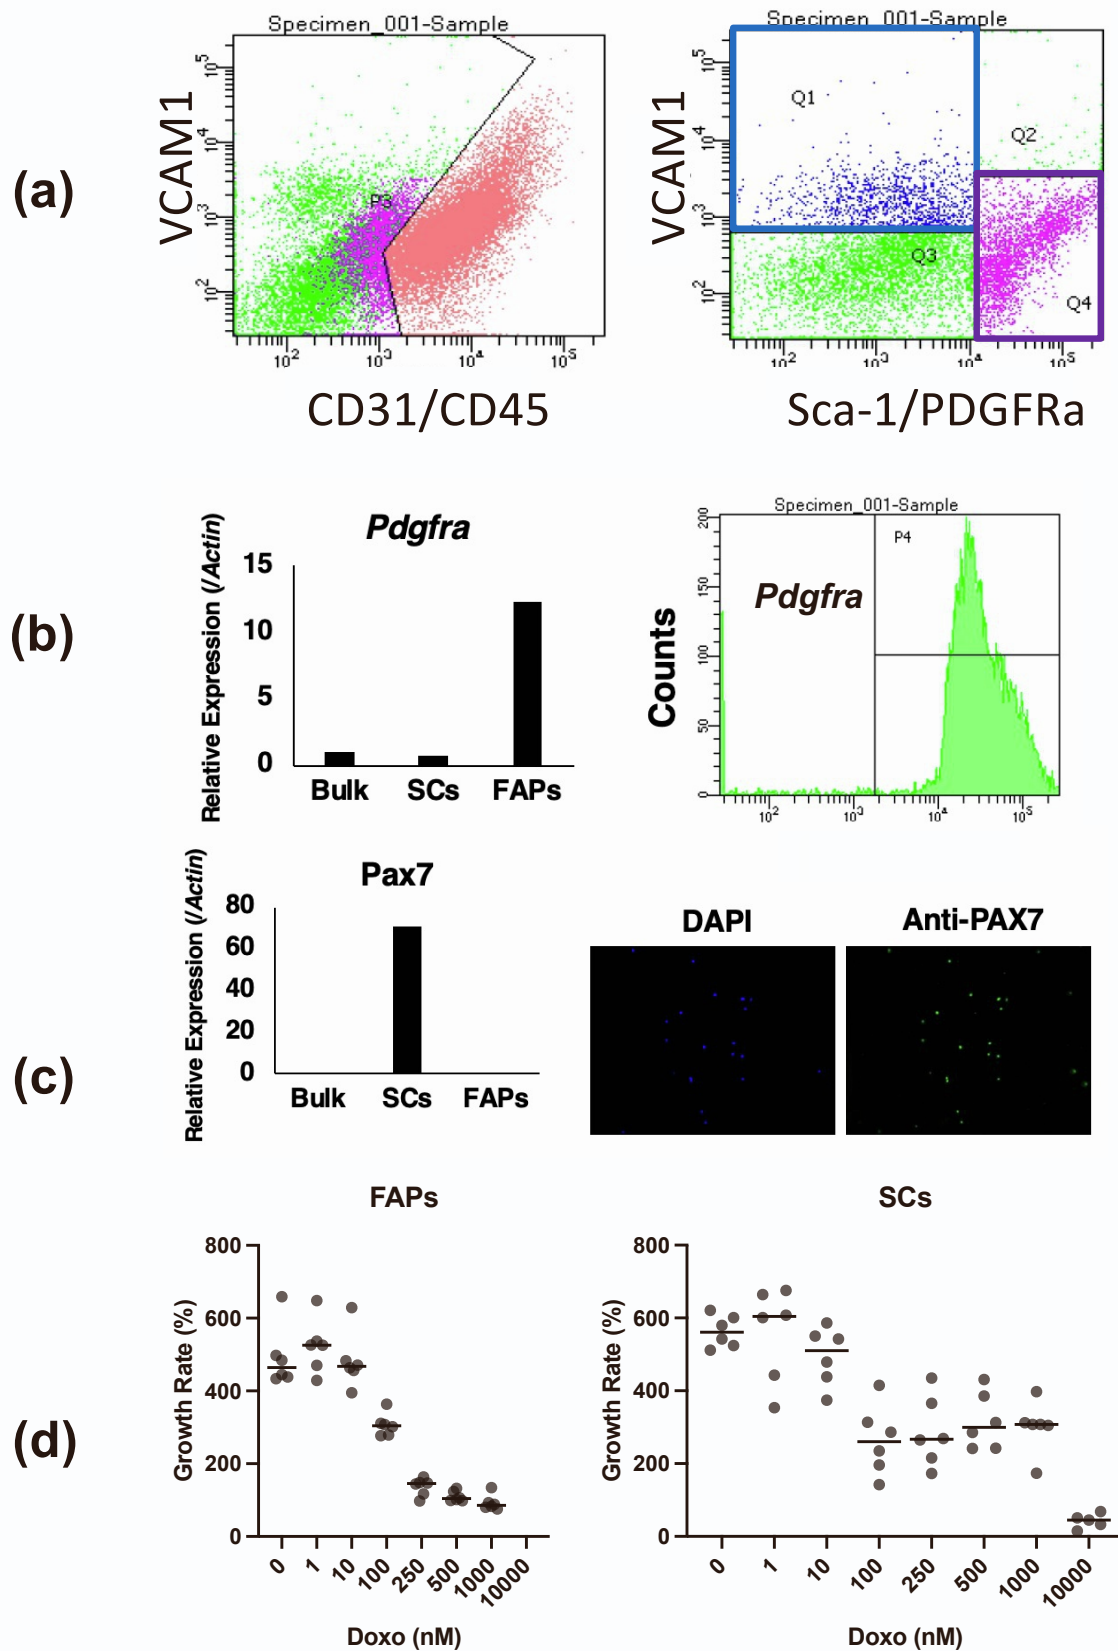

**Supplementary Fig. 5 (related to Fig. 3). FAP and SC isolation for primary culture.** (a) FACS gating strategy for isolating FAPs (purple: CD31<sup>-</sup>, CD45<sup>-</sup>, VCAM1<sup>-</sup> and Sca1<sup>+</sup>/PDGFR<sup>+</sup>) and SCs (blue: CD31<sup>-</sup>, CD45<sup>-</sup>, Sca1<sup>-</sup>, PDGFRa<sup>-</sup> and VCAM1<sup>+</sup>) from skeletal muscle. (b) (left) Expression analysis of *Pdgfra* in bulk populations, isolated SCs and FAPs by qRT-PCR. mRNA levels were normalized to *actin* mRNA. (Right) Reanalysis of FAP population by flow cytometry. (c) Expression analysis of *Pax7* in bulk populations (Bulk), isolated SCs and FAPs. mRNA levels were normalized to *actin* mRNA. (right) PAX7 Immunostaining of SC population. Cells were fixed and stained with DAPI (blue) and anti-PAX7 (green). (d) Optimization of Doxo concentration for use in FAPs and SCs. The growth rate for 72 h was measured by cell counting.

(a)

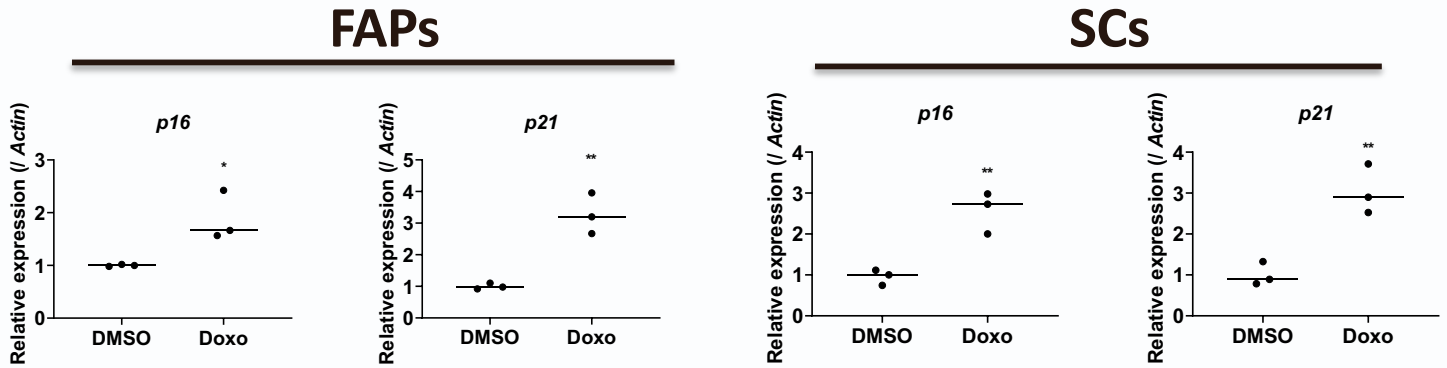

(b)

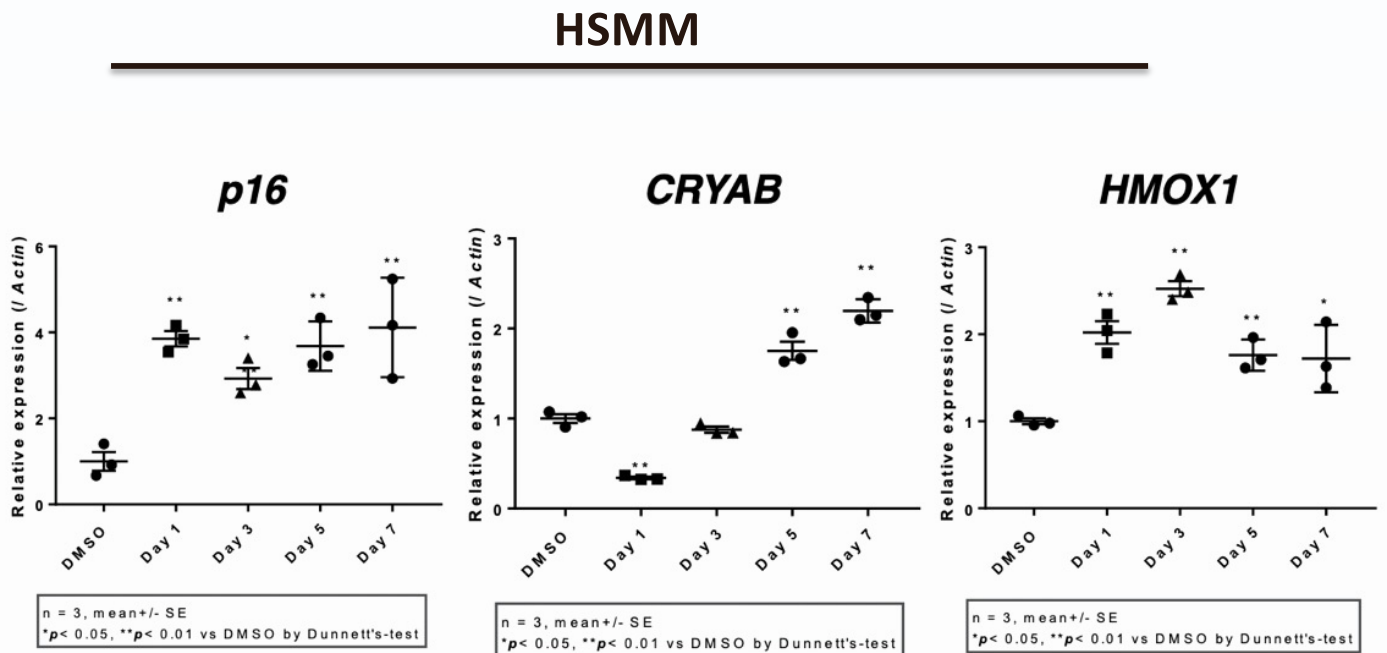

**Supplementary Fig. 6 (related to Fig. 3.) Expression of senescence marker genes in FAPs, SCs and HSMMs after Doxo treatment.** (a) Expression analysis of senescent marker genes in FAPs and SCs. (b) Expression analysis of senescent marker and target genes in HSMMs. RNA was collected at 7 d (a) or the indicated times, or (b) after replacing media containing Doxo. mRNA levels were quantified by qRT-PCR, and normalized *actin* mRNA. The average value of DMSO was set at 1.  $p$ -values versus DMSO were obtained using unpaired two-tailed Student's  $t$ -test (a) or Dunnett's multiple comparison test (b). \* $p < 0.05$ , \*\* $p < 0.01$ , \*\*\* $p < 0.001$  and \*\*\*\* $p < 0.0001$ .

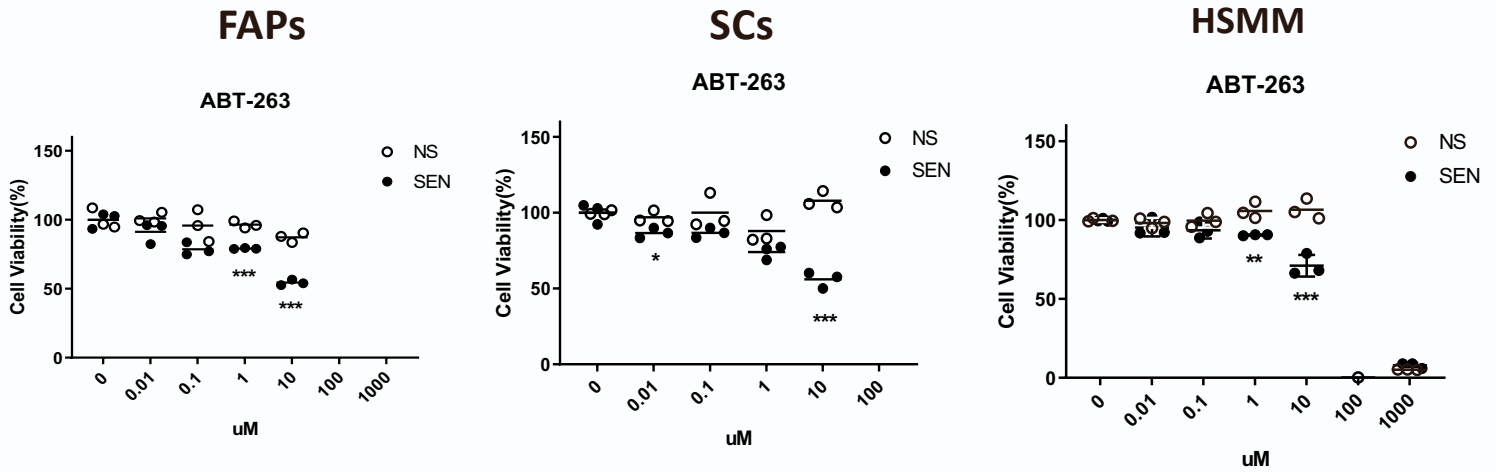

**Supplementary Fig. 7 (related to Fig. 4). Effects of ABT-263 on viability of FAPs, SCs and HSMMs.** Cells were cultured for 24 h, treated with Doxo for 24 h, then treated with ABT-263 at the indicated concentrations. Cell viability was analyzed at day 3 (HSMMs) or 5 (FAPs and SCs) for non-senescent (NS) and senescent cells (SEN). Black and white dots indicate NS and SEN, respectively. The average value of 0 M for each group was set at 100%.  $p$ -values versus NS are obtained using unpaired two-tailed Student's  $t$ -test. \* $p < 0.05$ , \*\* $p < 0.01$ , \*\*\* $p < 0.001$ .

(a)

**Treatment timeline**

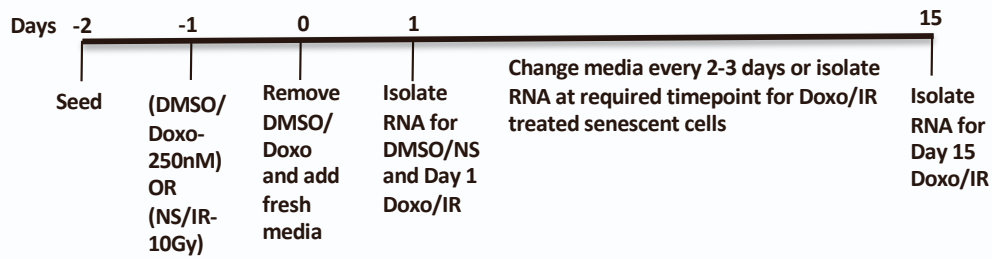

(b)

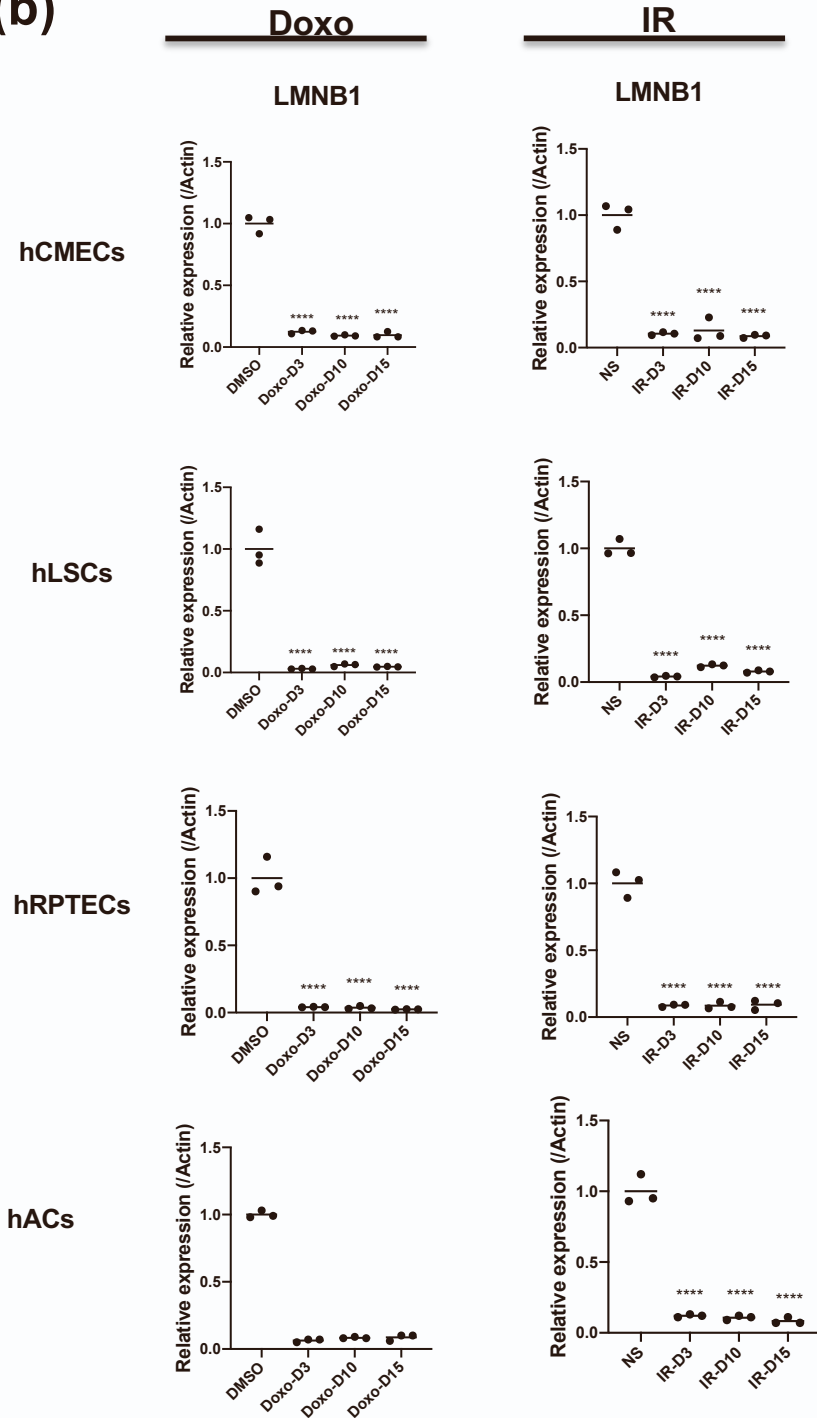

**Supplementary Fig. 8 (related to Fig. 6). LMNB1 expression in response to Doxo or IR (a) Experimental timeline. (b) Doxo or IR reduced LMNB1 mRNA in hCMECs, hLSCs, hRPTECs, and hACs. Senescence was induced by either 250 nM Doxo for 24 h or 10 Gy X-rays. qRT-PCR was performed on RNA samples from DMSO/ Doxo treated or NS/IR-treated non-senescent or senescent (SEN) cells at indicated times. mRNA levels were normalized to *actin* mRNA. The average values of DMSO or NS was set at 1. For qRT-PCR: mean +/- SE, n =4, \* $p < 0.05$ , \*\* $p < 0.01$ , \*\*\* $p < 0.001$ , \*\*\*\* $p < 0.0001$  by Dunnett's multiple comparisons test vs DMSO or NS.**

(a)

**Treatment timeline**

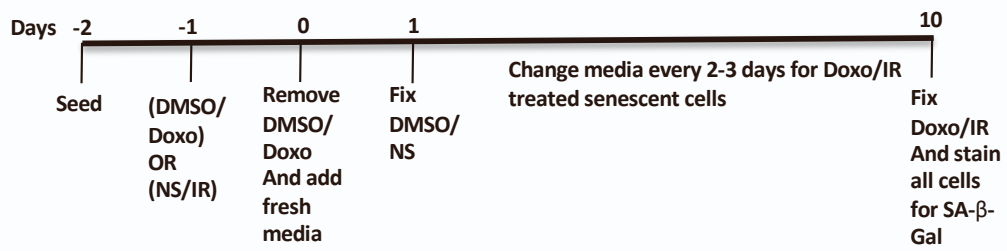

(b)

**Doxo - SA- $\beta$ -Gal staining**

**IR - SA- $\beta$ -Gal staining**

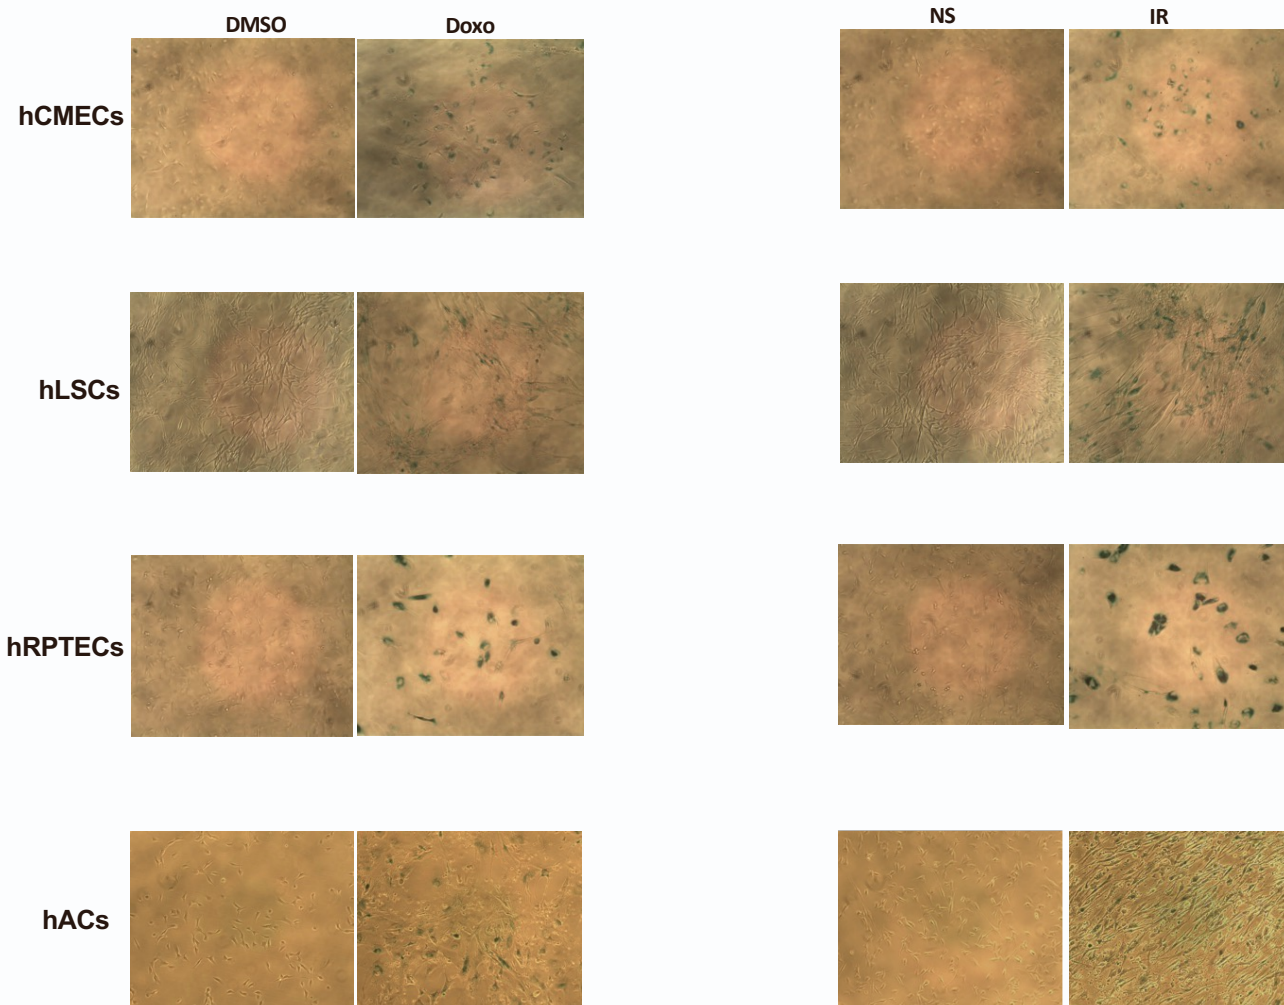

**Supplementary Fig. 9 (related to Fig. 6) | SA- $\beta$ -Gal staining in diverse cell types** (a) Experimental timeline. (b) Doxo or Ionizing Radiation(IR) induced SA- $\beta$ -gal in hCMECs, hLSCs, hRPTECs and hACs. 10 d after DMSO/Doxo or Non-Senescent (NS)/IR treatment, SA- $\beta$ -gal staining was performed. The majority of cells were SA- $\beta$ -Gal positive after Doxo or IR.



**(a)**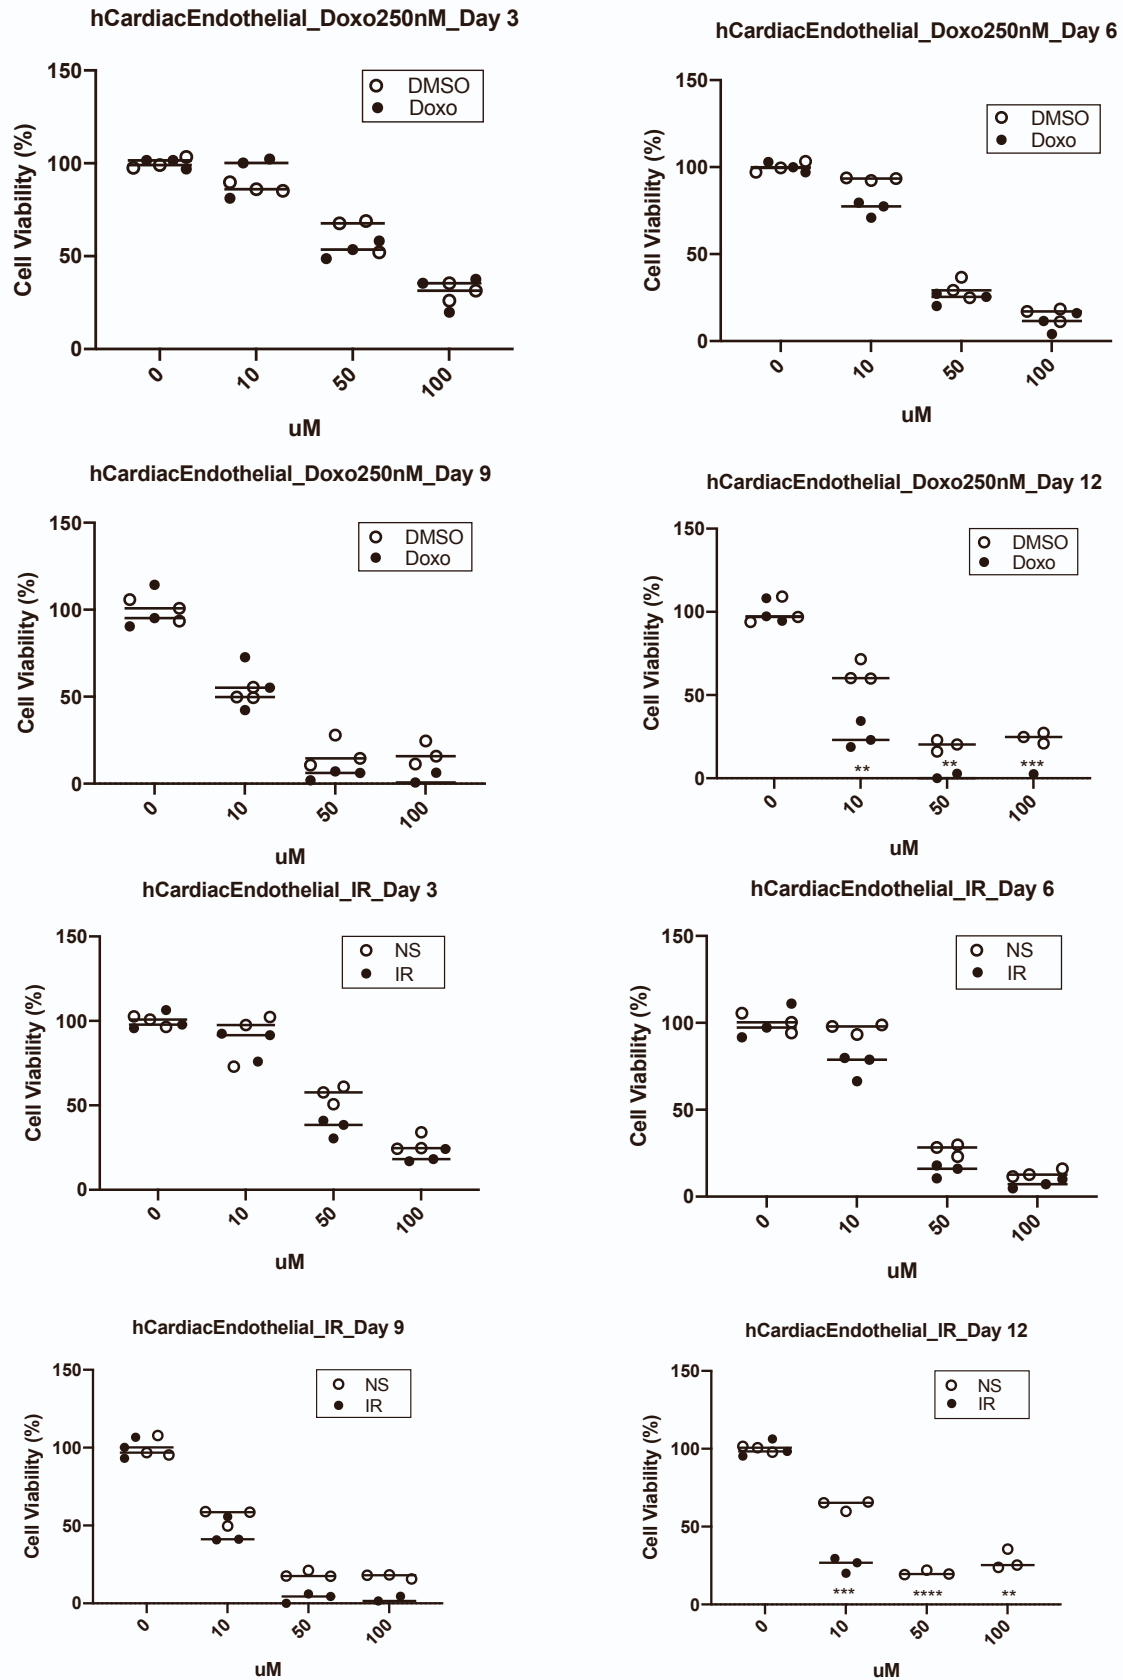**(b)**

**Supplementary Fig. 10 (related to Fig. 6-7). 25HC treatment of human cardiac endothelial cells** (a) 25HC effects on DMSO- or Doxo-treated hCMECs at various times. Cells were treated with DMSO or 250 nM Doxo for 24 h. 25HC treatment was started 24 h after DMSO or Doxo treatment. Cell viability was measured every 3–5 days until 15 days. (b) 25HC effects on NS or IR-treated hCMECs at various times. Cells were treated with either NS or 10-Gy IR. 25HC treatment was started 24 h later. Cell viability was measured every 3–5 days until 15 days. For cell viability assays: mean +/- SE, n =3, \*\* $p < 0.01$ , \*\*\* $p < 0.001$ , \*\*\*\* $p < 0.0001$  vs 0 mM by student's t-test.

**(a)**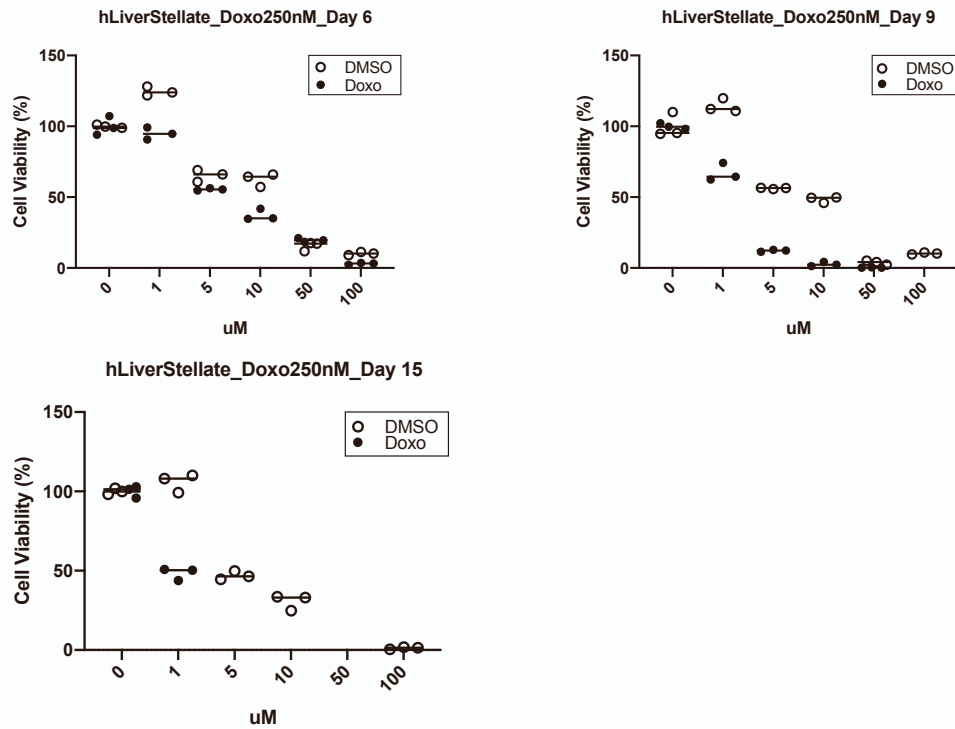**(b)**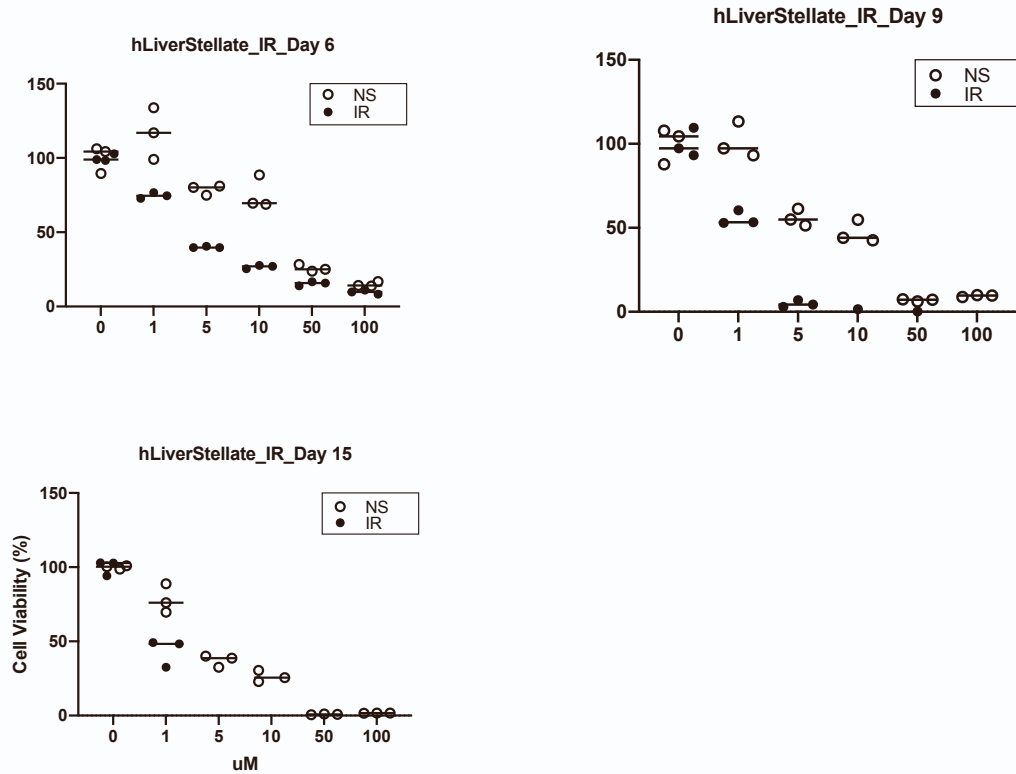

**Supplementary Fig. 11 (related to Fig. 7). 25HC treatment of human liver stellate cells** (a) 25HC effects on DMSO- or Doxo-treated hLSCs at various times. Cells were treated with either DMSO or 250 nM Doxo for 24 h. 25HC treatment was started 24 h later. Cell viability was measured every 3–5 days until 15 days. (b) 25HC effects on NS or IR-treated hLSCs at various times. Cells were either NS or SEN. 25HC treatment was started 24 h later. Cell viability was measured every 3–5 days until 15 days. For cell viability assays: mean  $\pm$  SE,  $n = 3$ , \*\* $p < 0.01$ , \*\*\* $p < 0.001$ , \*\*\*\* $p < 0.0001$  vs 0 mM by student's t-test.

**(a)**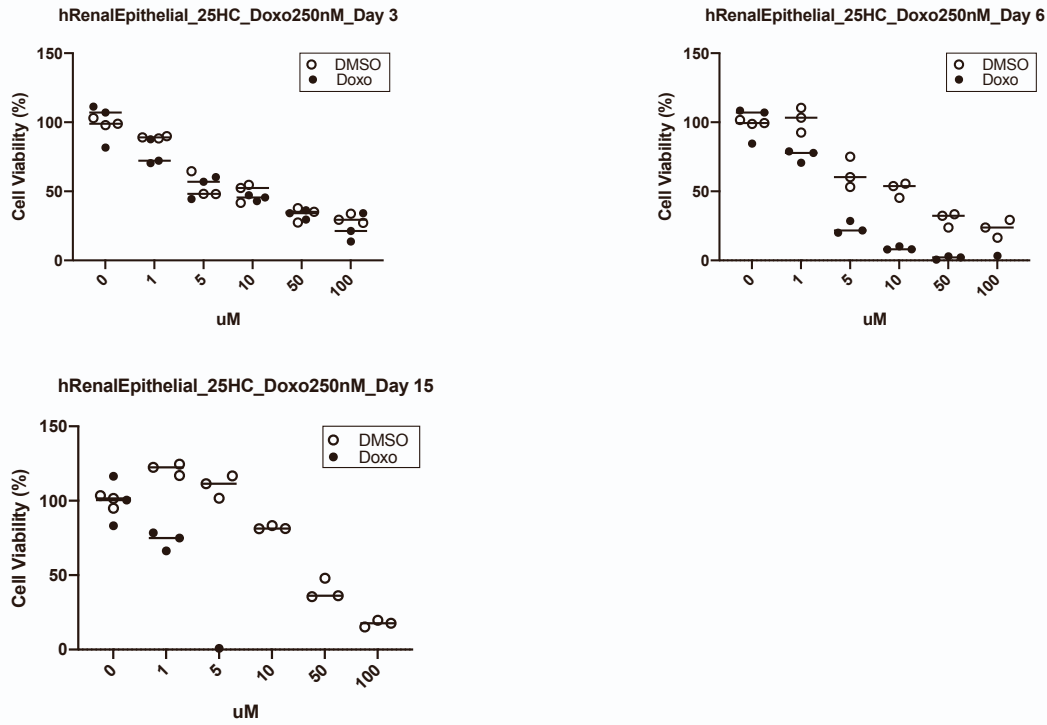**(b)**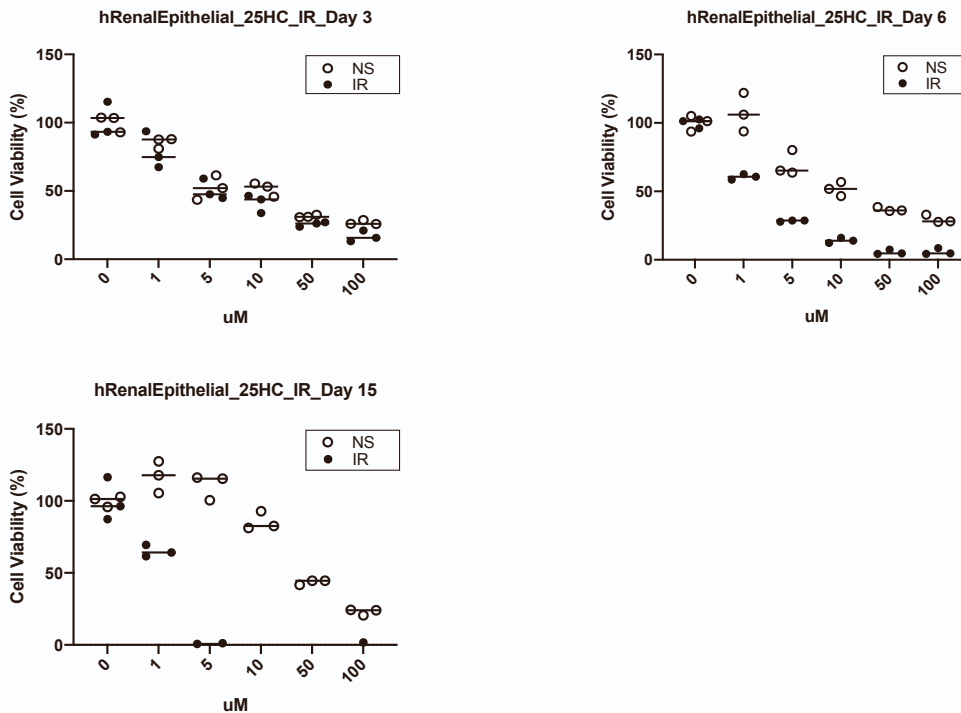

**Supplementary Fig. 12 (related to Fig. 7) | 25HC treatment of human renal epithelial cells** (a) 25HC effects on DMSO- or Doxo-treated hRPTECs at various times. Cells were treated with DMSO or 250 nM Doxo for 24 h. 25HC treatment was started 24 h later. Cell viability was measured every 3–5 days until 15 days. (b) 25HC effects on NS or IR-treated hRPTECs at various times. Cells were NS or treated with 10-Gy X-rays. 25HC treatment was started 24 h later. Cell viability was measured every 3–5 days until 15 days. For cell viability assays: mean  $\pm$  SE,  $n = 3$ ,  $**p < 0.01$ ,  $***p < 0.001$ ,  $****p < 0.0001$  vs 0 mM by student's t-test.

**(a)**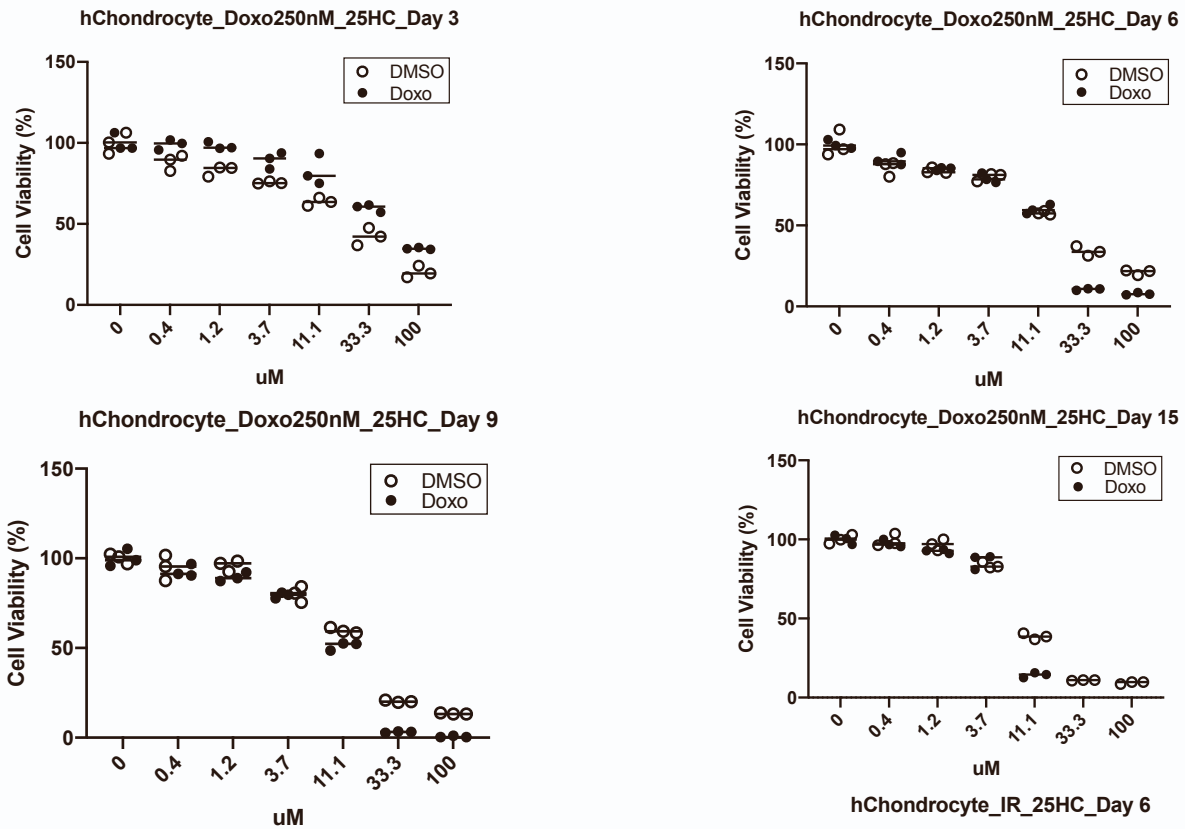**(b)**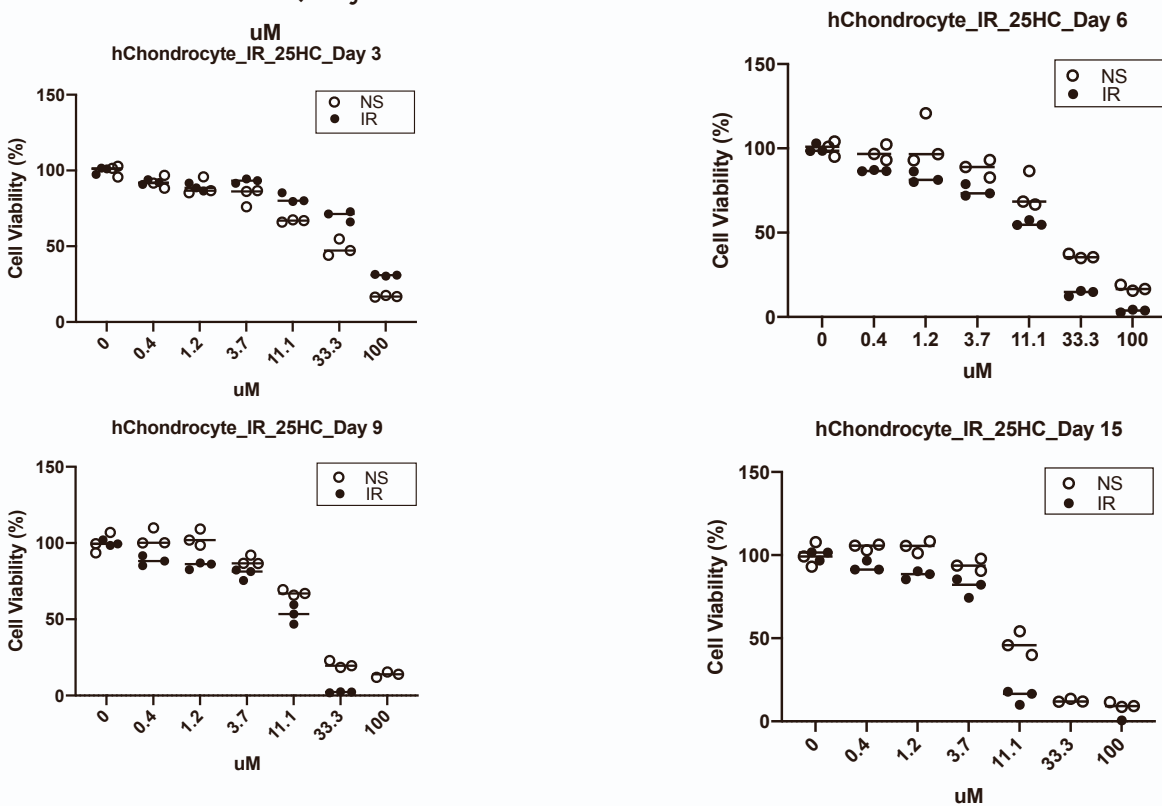

**Supplementary Fig. 13 (related to Fig. 7). 25HC treatment of human articular chondrocytes** (a) 25HC effects on DMSO- or Doxo-treated hACs at various times. Cells were treated with DMSO or 250 nM Doxo for 24 h. 25HC treatment was started 24 h later. Cell viability was measured every 3–5 days until 15 days. (b) 25HC effects on NS or IR-treated hACs at various times. Cells were NS or treated with 10-Gy X-rays. 25HC treatment was started 24 h later. Cell viability was measured every 3–5 days until 15 days. For cell viability assays: mean  $\pm$  SE,  $n=3$ , \*\* $p<0.01$ , \*\*\* $p<0.001$ , \*\*\*\* $p<0.0001$  vs 0 mM by student's t-test.

## TA

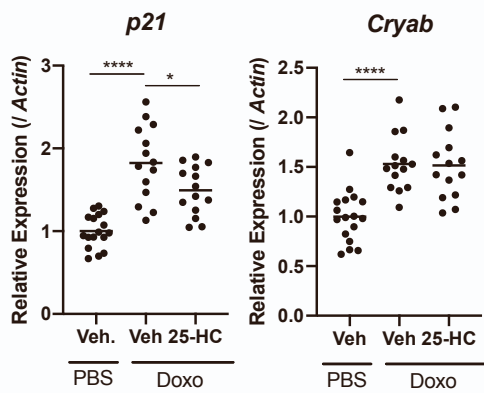

## Visceral Fat

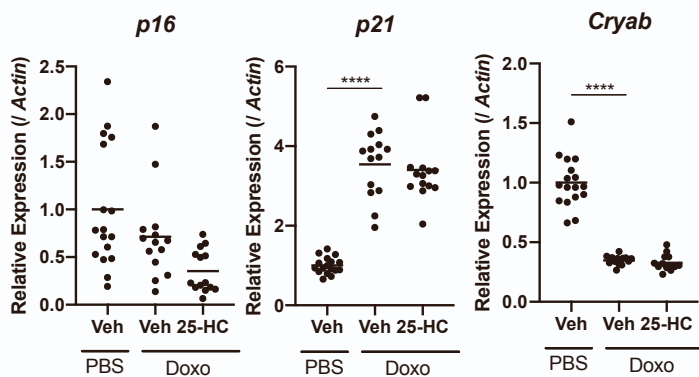

## Liver

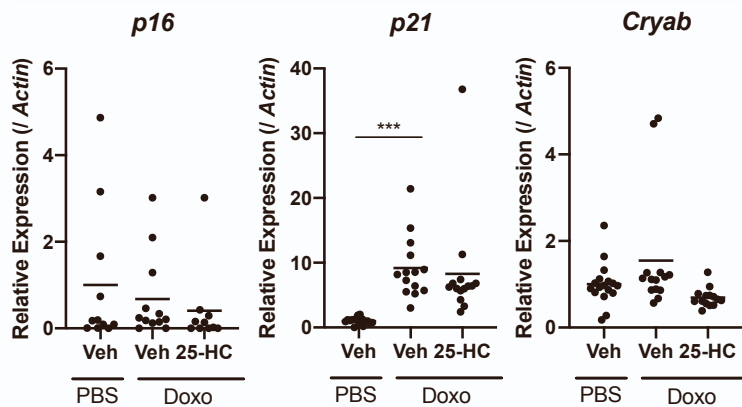

## Heart

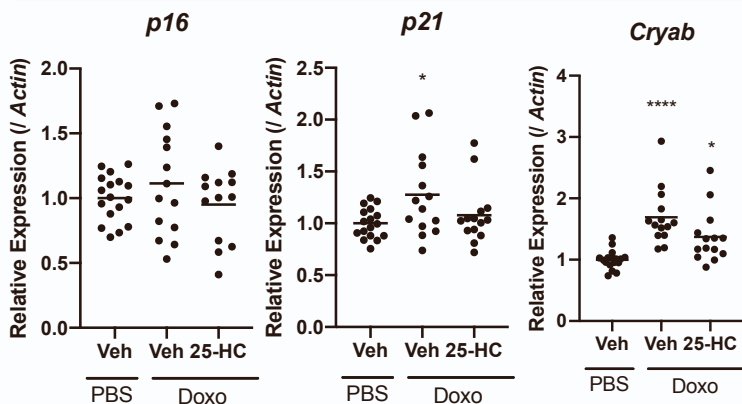

**Supplementary Fig. 14 (related to Fig. 8). Expression of *Cdkn2a*, *Cdkn1a* and *CryAB* in visceral fat, tibialis anterior (TA) muscle, kidney, liver, lung, heart and skin of Doxo-treated mice.** qRT-PCR was performed on RNA from the tissue above, and mRNA levels were normalized to *actin* mRNA. The average value of the vehicle group was set at 1. *p*-values versus PBS-Vehicle or Doxo-Vehicle are obtained using Tukey's multiple comparisons test. \**p* < 0.05, \*\*\**p* < 0.001 and \*\*\*\**p* < 0.0001.

## Kidney

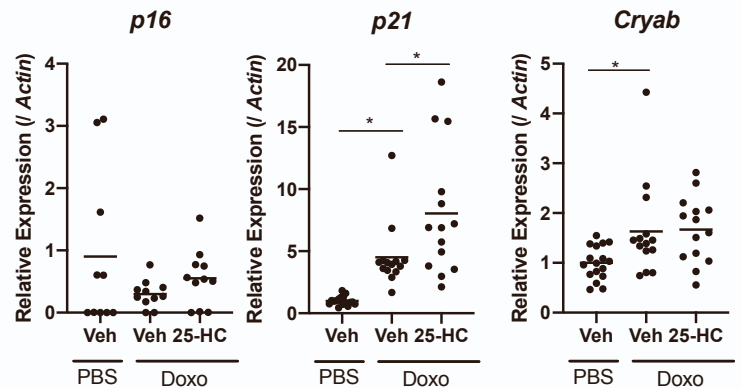

## Lung

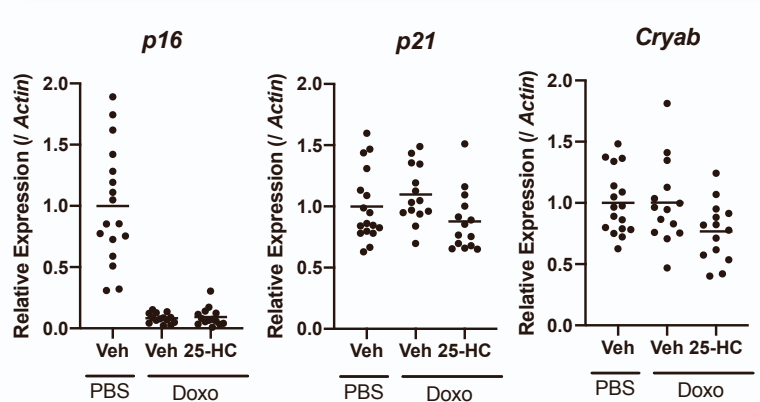

## Skin

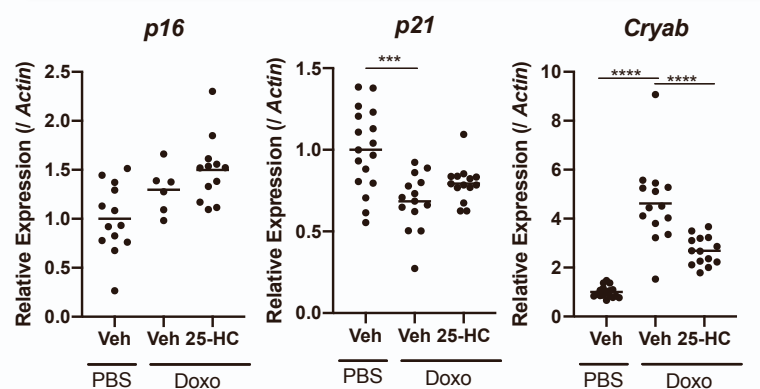

**TA**

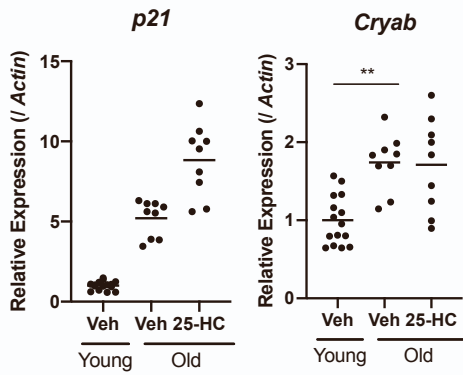

**Supplementary Fig. 15 (related to Fig. 9).  
Expression of *Cdkn2a*, *Cdkn1a* and *CryAB* in visceral fat, tibialis anterior (TA) muscle, kidney, liver, lung, heart and skin of old male mice.** qRT-PCR was performed on RNA from the tissues above, and mRNA levels were normalized to *actin* mRNA. The average value of the young vehicle group was set at 1. *p*-values versus Young-Vehicle or Old-Vehicle were obtained using Tukey's multiple comparisons test. \**p* < 0.05, \*\**p* < 0.01, \*\*\**p* < 0.001 \*\*\*\**p* < 0.0001.

**Visceral Fat**

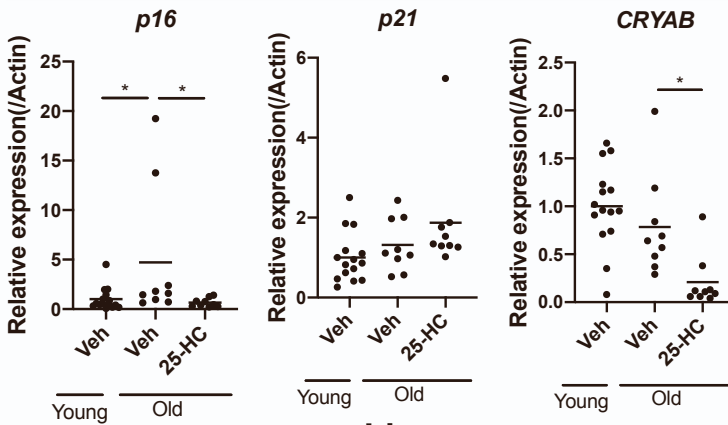

**Kidney**

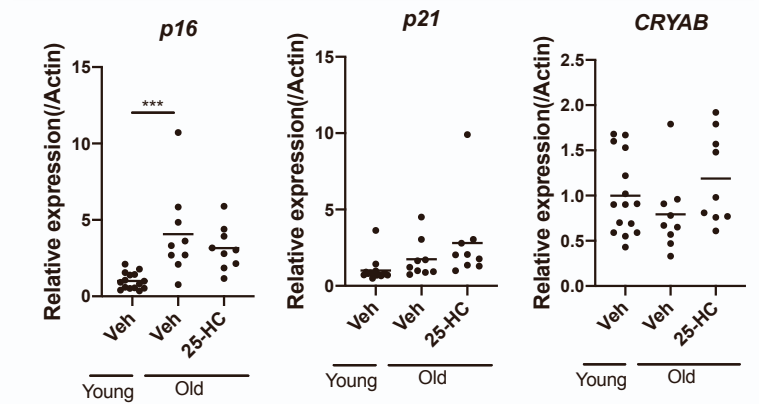

**Liver**

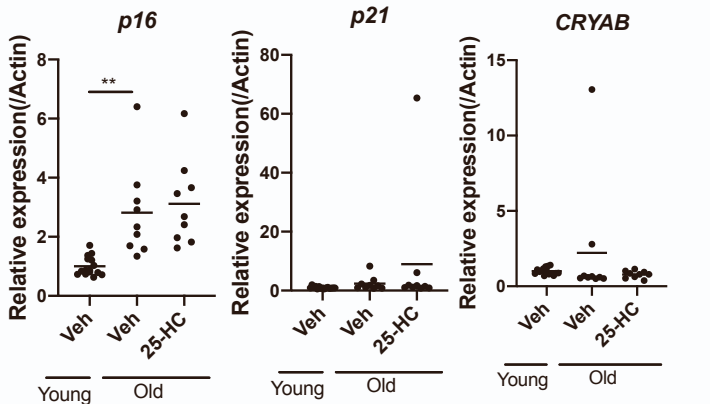

**Lung**

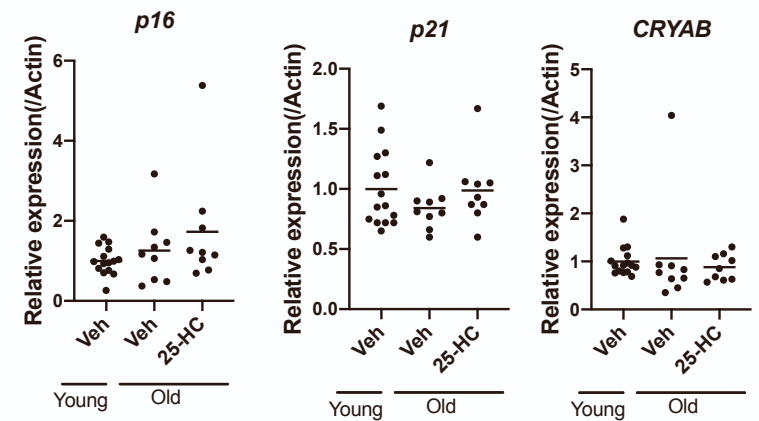

**Heart**

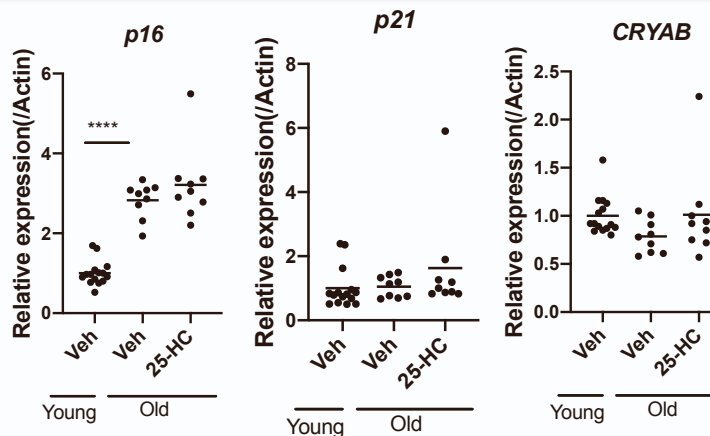

**Skin**

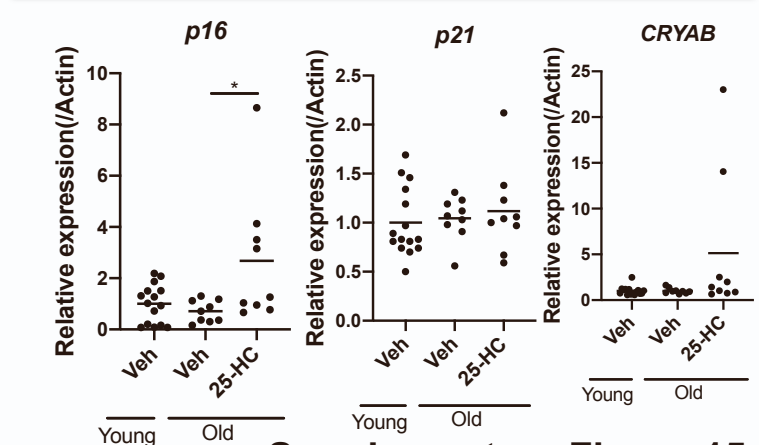

**TA**

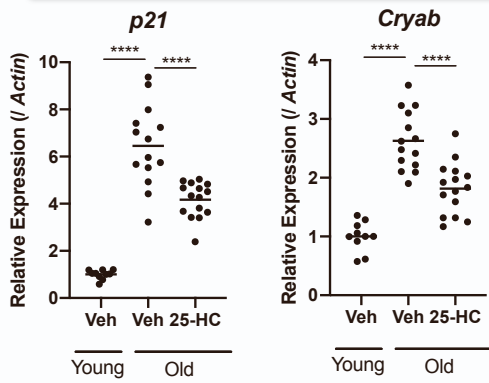

**Supplementary Fig. 16 (related to Fig. 9). Expression of *Cdkn2a*, *Cdkn1a* and *CryAB* in visceral fat, tibialis anterior (TA) muscle, kidney, liver, lung, heart and skin of old female mice. qRT-PCR was performed on RNA from the tissues above, and mRNA levels were normalized to *actin* mRNA. The average value of the young vehicle group was set at 1. *p*-values versus Young-Vehicle or Old-Vehicle are obtained using Tukey's multiple comparisons test. \**p* < 0.05, \*\**p* < 0.01, \*\*\**p* < 0.001 \*\*\*\**p* < 0.0001.**

**Visceral Fat**

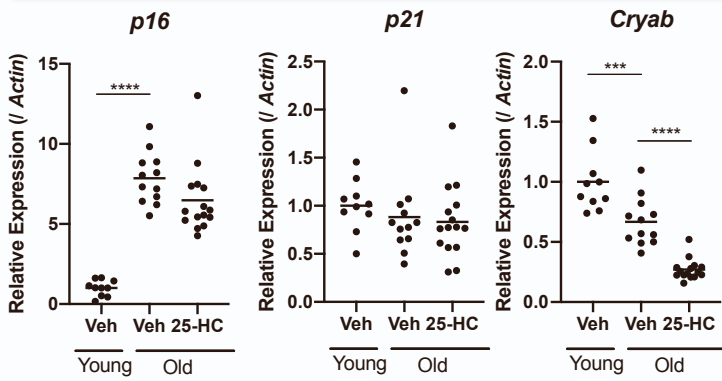

**Kidney**

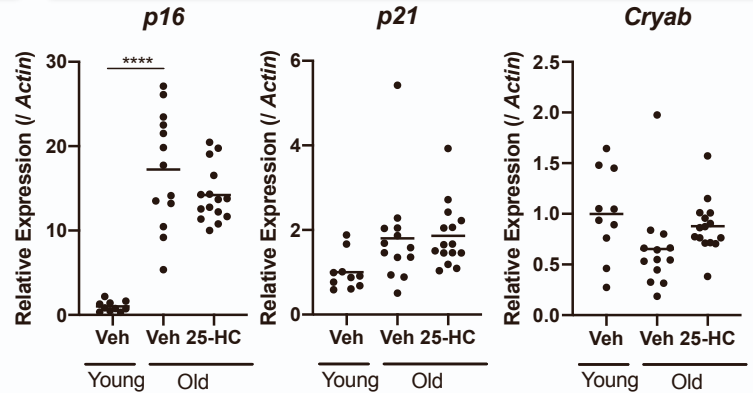

**Liver**

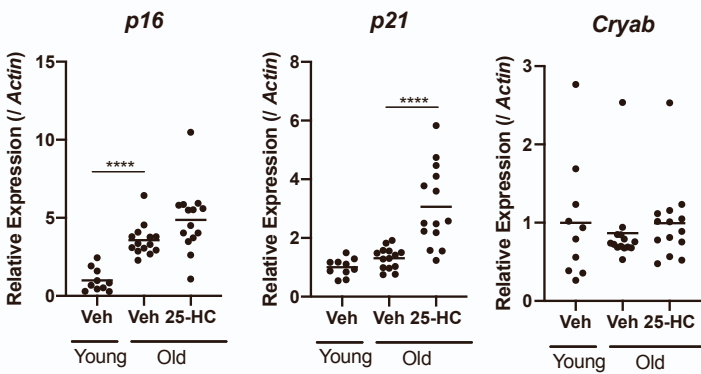

**Lung**

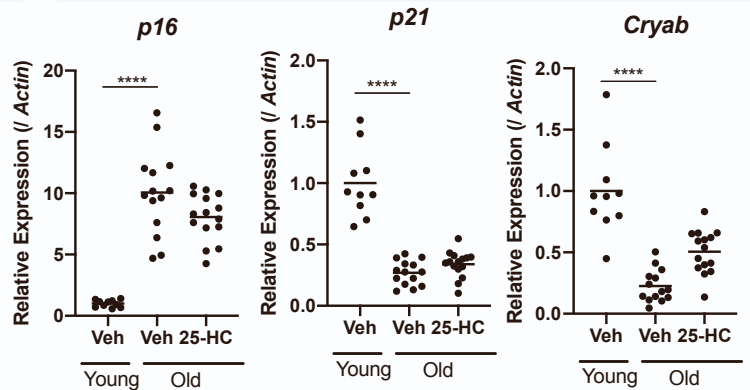

**Heart**

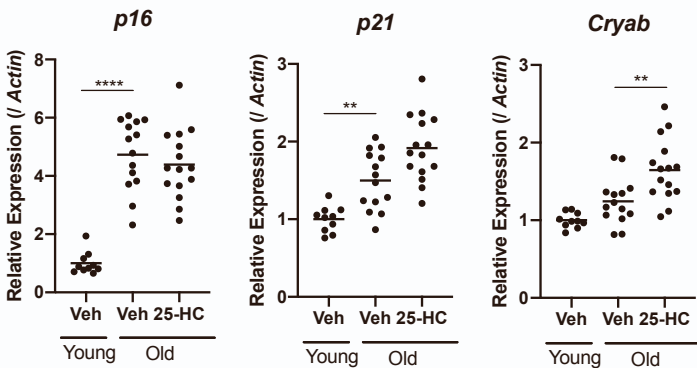

**Skin**

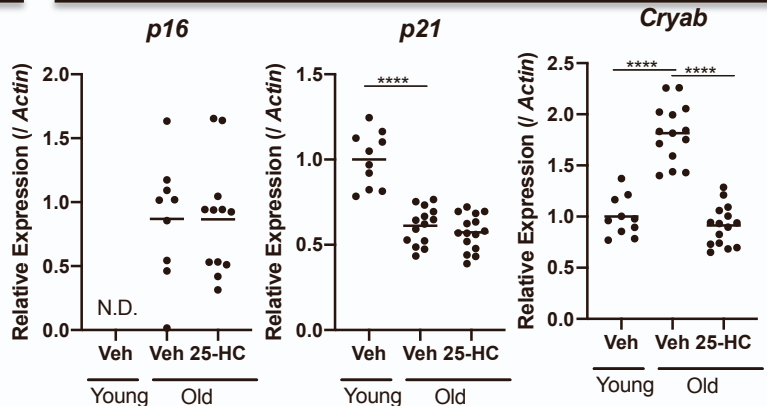



**Supplementary Fig. 17 (related to Fig. 8). Expression of SASP factors *Il6*, *Mmp2*, *Timp2* and *Tgfb3* in Gastroc and soleus muscles of Doxo-treated mice.** qRT-PCR was performed on RNA from the muscles. mRNA levels were normalized to actin mRNA. The average value of the vehicle group was set at 1. *p*-values versus PBS-Veh or Doxo-Veh are obtained using Tukey's multiple comparisons test. \*\*\*\**p*< 0.0001.

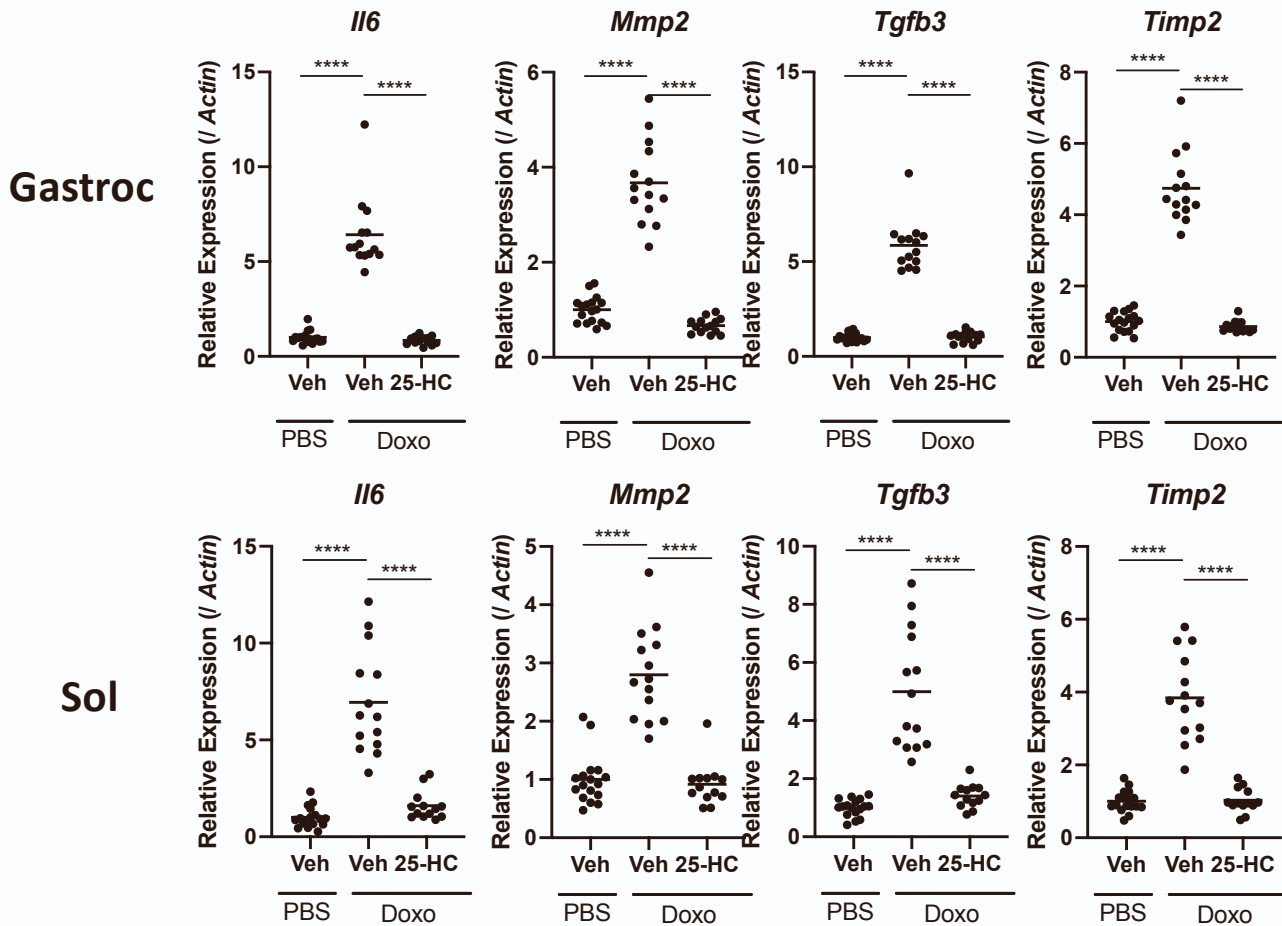

## Male

**Gastroc**

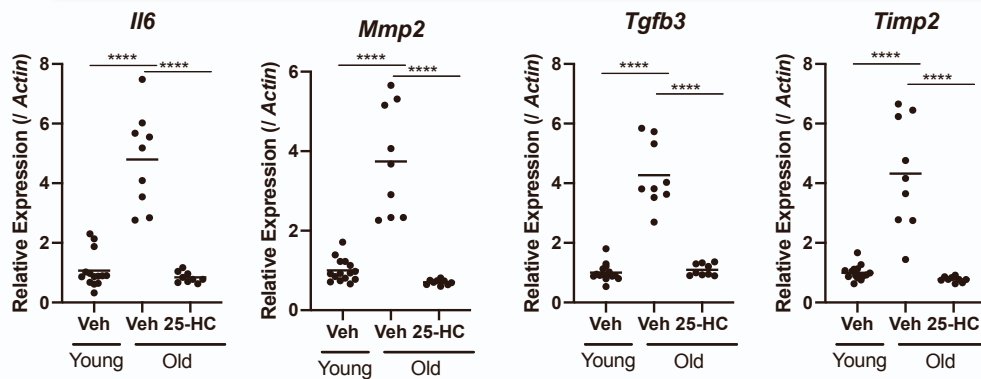

**Soleus**

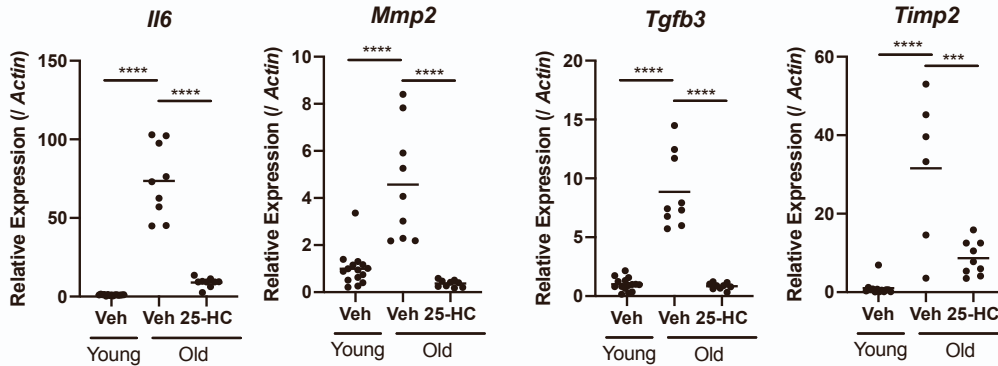

## Female

**Gastroc**

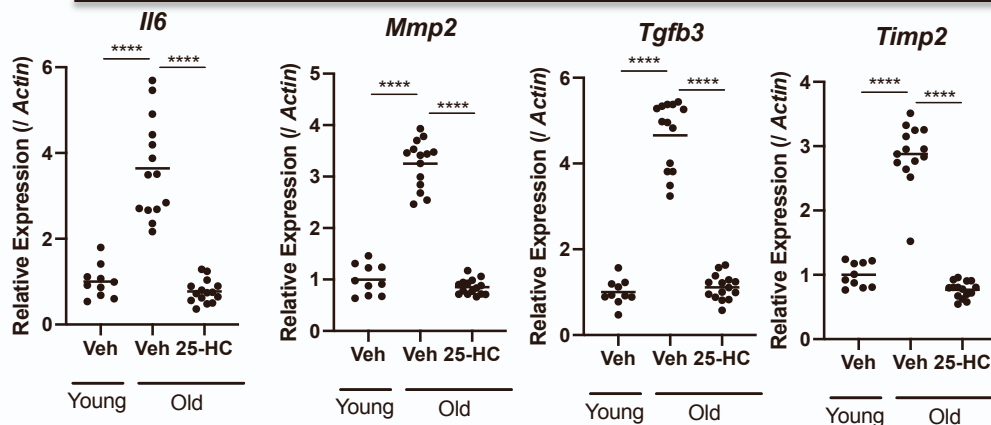

**Soleus**

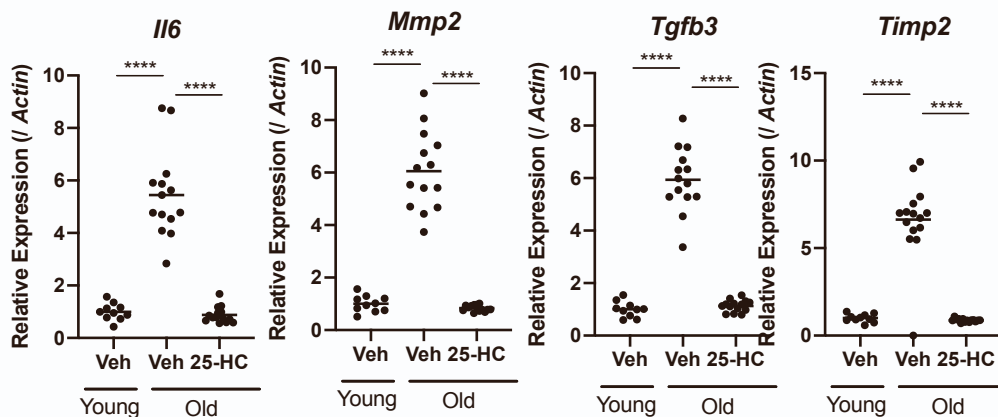

**Supplementary Fig. 18 (related to Fig. 9). Expression of SASP factors *Il6*, *Mmp2*, *Timp2* and *Tgfb3* in Gastroc and soleus muscles of 25HC treated aged mice.** qRT-PCR was performed on RNA from the muscles. mRNA levels were normalized to *actin* mRNA. The average value of the vehicle group was set at 1.  $p$ -values versus Young-Vehicle or Old-Vehicle is obtained using Tukey's multiple comparisons test. \*\*\* $p < 0.001$  and \*\*\*\* $p < 0.0001$ .
